# Supplementary material for: ILF2 enhances the DNA cytosine deaminase activity of tumor mutator APOBEC3B in multiple myeloma cells
Source: PubMed Central journal article supplement (PMC8831623; doi:10.1038/s41598-022-06226-3), 2022-02-10
Supplement: 41598_2022_6226_MOESM4_ESM.pdf [file 41598_2022_6226_MOESM4_ESM.pdf]

Supplementary Information for

**ILF2 enhances the DNA cytosine deaminase activity of tumor mutator APOBEC3B in multiple myeloma cells**

Yasuhiro Kazuma<sup>1</sup>, Kotaro Shirakawa<sup>1\*</sup>, Yusuke Tashiro<sup>1</sup>, Hiroyuki Yamazaki<sup>1</sup>, Ryosuke Nomura<sup>1</sup>, Yoshihito Horisawa<sup>1</sup>, Suguru Takeuchi<sup>1</sup>, Emani Stanford<sup>1</sup>, Yoshinobu Konishi<sup>1</sup>, Hiroyuki Matsui<sup>1</sup>, Tadahiko Matsumoto<sup>1</sup>, Fumiko Tanabe<sup>2</sup>, Ryo Morishita<sup>2</sup>, Shinji Ito<sup>3</sup> and Akifumi Takaori-Kondo<sup>1</sup>

From the <sup>1</sup>Department of Hematology and Oncology, Graduate School of Medicine, Kyoto University, Kyoto, Japan, <sup>2</sup>CellFree Sciences Co., Ltd., Ehime, Japan, <sup>3</sup>Medical Research Support Center, Graduate School of Medicine, Kyoto University, Kyoto, Japan

# Supplementary Figure S1

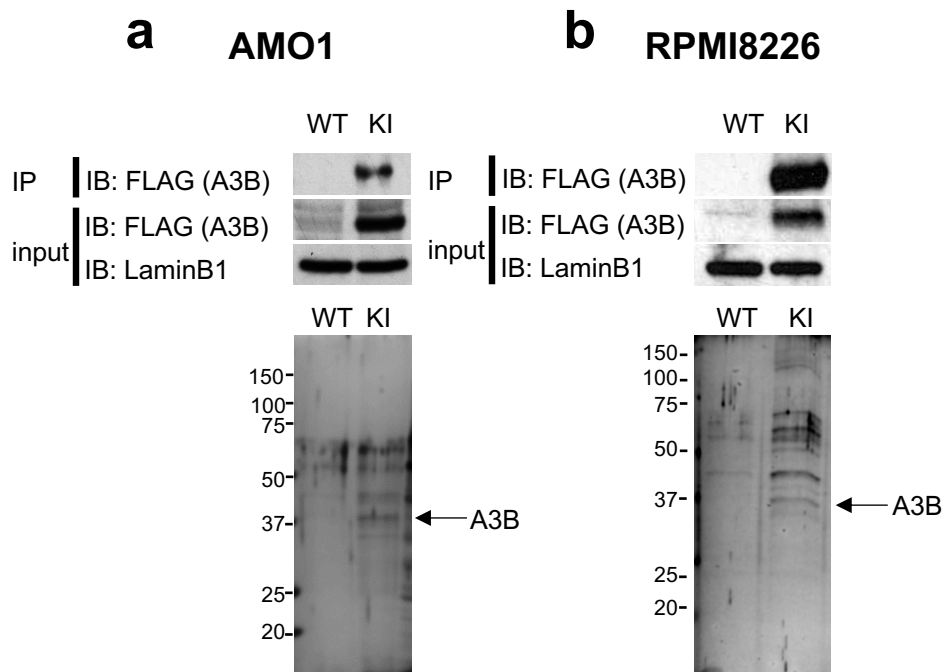

**Supplementary Figure S1.** Silver-stained gel illustrating co-immunoprecipitated proteins used in MS analysis. Immunoblot analysis (upper panels) and silver staining (lower panels) of the proteins co-immunoprecipitated with A3B-FLAG in AMO1 (a) and RPMI8226 (b) cells. LaminB1 is an endogenous control. *WT*, wild type (parental) cell lines. *KI*, 3 × FLAG-IRES-EGFP knock-in cell lines. Original blots and gels are presented in Supplementary Figure S16.

# Supplementary Figure S2

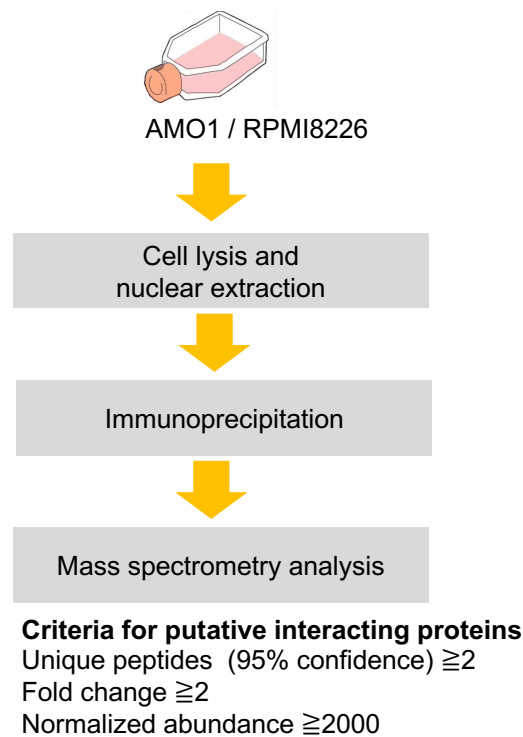

**Supplementary Figure S2.** Schematic workflow of the interactome analysis. Fold change was calculated as the normalized abundances in knock-in cell lines divided by those in wild type (parental) cell lines.

# Supplementary Figure S3

## FLAG (A3B)

202FNN<sup>D</sup>PLVLR<sup>210</sup>

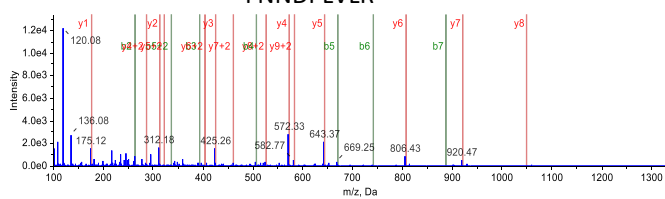

## SAFB

720DDAYWPEAK<sup>728</sup>

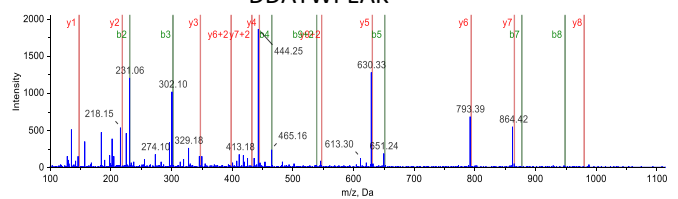



# Supplementary Figure S4

## FLAG (A3B)

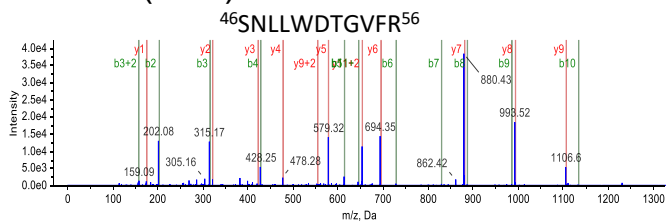

## SAFB

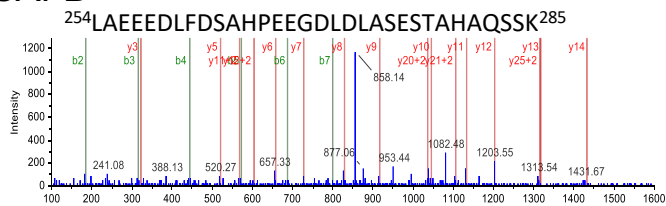

## SRSF7

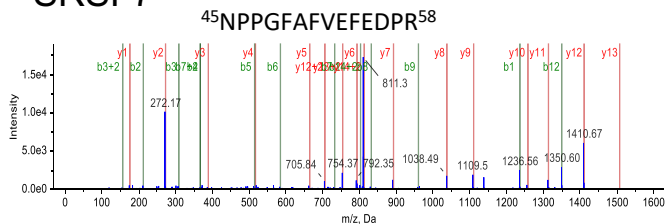

## Matrin-3

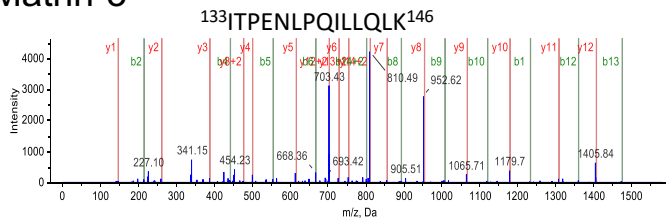

## ILF2

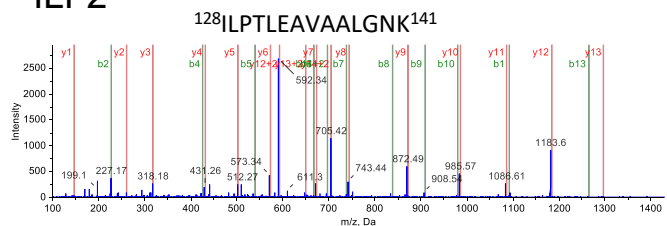

## DHX9

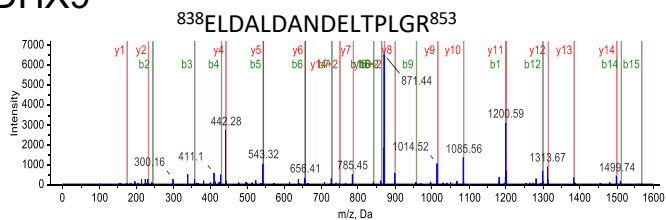

## RBMX

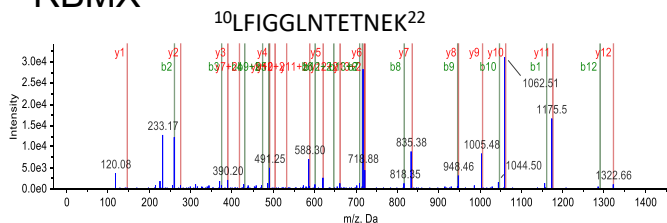

## hnRNP A1

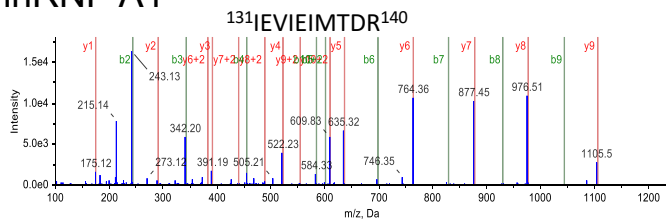

## PTBP1

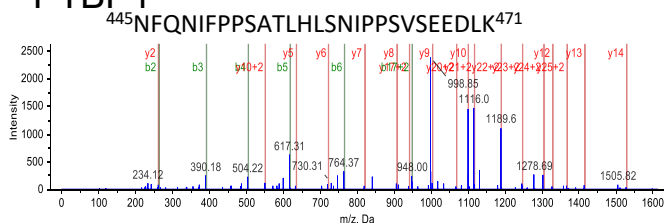

## hnRNP K

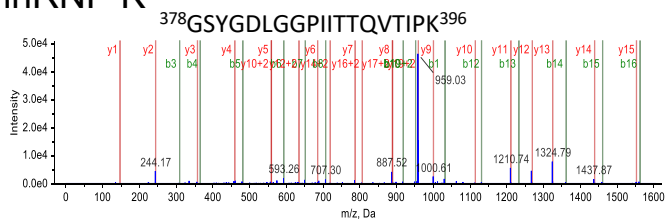

## hnRNP A3

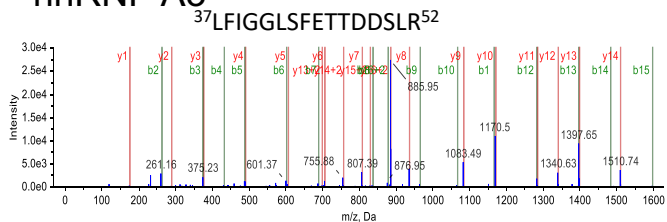

## hnRNP C

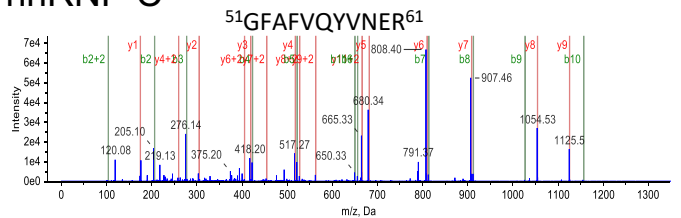

**Supplementary Figure S4.** Representative spectra of MS/MS showing the identified sequence of peptides derived from representative interacting protein candidates in the FLAG-IP lysate of RPMI8226 cells.

# Supplementary Table S1

| GENEPEPT ID                       | Protein Name | AMO1            |           |         |             | RPMI8226        |           |         |             |
|-----------------------------------|--------------|-----------------|-----------|---------|-------------|-----------------|-----------|---------|-------------|
|                                   |              | Unique peptides | Abundance |         | Fold Change | Unique peptides | Abundance |         | Fold Change |
|                                   |              |                 | AMO1-KI   | AMO1-WT |             |                 | RPMI-KI   | RPMI-WT |             |
| Q9UH17                            | APOBEC3B     | 54              | 32347.2   | 226.6   | 142.7       | 30              | 28176.5   | 90.8    | 310.4       |
| <b>RNA helicase</b>               |              |                 |           |         |             |                 |           |         |             |
| Q92841                            | DDX17        | 23              | 6295.8    | 1132.9  | 5.6         | 21              | 5288.4    | 56.2    | 94.1        |
| Q08211                            | DHX9         | 45              | 2526.1    | 387.9   | 6.5         | 39              | 4687.1    | 109.7   | 42.7        |
| P38919                            | EIF4A3       | 21              | 2835.2    | 985.8   | 2.9         | 7               | 2790.7    | 52.3    | 53.3        |
| <b>Ribonucleoproteins</b>         |              |                 |           |         |             |                 |           |         |             |
| P09651                            | HNRNPA1      | 27              | 28337.5   | 700.2   | 40.5        | 41              | 72566.6   | 288.1   | 251.9       |
| P22626                            | HNRNPA2B1    | 47              | 56381.1   | 1300.8  | 43.3        | 24              | 21786.4   | 60.8    | 358.0       |
| P51991                            | HNRNPA3      | 33              | 53511.9   | 1252.9  | 42.7        | 19              | 20259.5   | 61.7    | 328.1       |
| P07910                            | HNRNPC       | 26              | 51302.5   | 1212.5  | 42.3        | 31              | 98860.7   | 398.6   | 248.0       |
| P31943                            | HNRNPH1      | 21              | 12736.5   | 718.6   | 17.7        | 20              | 19754.3   | 502.9   | 39.3        |
| P61978                            | HNRNPK       | 45              | 17996.1   | 3184.3  | 5.7         | 40              | 37238.7   | 1191.4  | 31.3        |
| P14866                            | HNRNPL       | 48              | 16274.2   | 804.4   | 20.2        | 44              | 21567.4   | 146.4   | 147.3       |
| P52272                            | HNRNPM       | 24              | 3624.6    | 352.3   | 10.3        | 29              | 5806.1    | 35.0    | 166.1       |
| O43390                            | HNRNPR       | 37              | 16275.7   | 463.9   | 35.1        | 33              | 24710.1   | 77.9    | 317.2       |
| Q00839                            | HNRNPU       | 103             | 50213.0   | 1884.5  | 26.6        | 28              | 11012.5   | 53.9    | 204.5       |
| Q1KMD3                            | HNRNPUL2     | 26              | 2392.4    | 441.1   | 5.4         | 24              | 4044.5    | 88.2    | 45.8        |
| P26599                            | PTBP1        | 20              | 3160.9    | 641.8   | 4.9         | 33              | 10262.7   | 70.4    | 145.8       |
| P38159                            | RBMX         | 7               | 40144.0   | 5631.9  | 7.1         | 18              | 37167.3   | 304.1   | 122.2       |
| P62318                            | SNRPD3       | 5               | 6789.1    | 1659.4  | 4.1         | 4               | 2467.4    | 79.6    | 31.0        |
| O60506                            | SYNCRIP      | 24              | 4843.1    | 137.1   | 35.3        | 26              | 6207.0    | 50.6    | 122.6       |
| <b>Splicing factor</b>            |              |                 |           |         |             |                 |           |         |             |
| Q15424                            | SAFB         | 11              | 6169.1    | 769.2   | 8.0         | 8               | 3146.4    | 73.6    | 42.7        |
| O75494                            | SRSF10       | 8               | 7494.1    | 836.0   | 9.0         | 7               | 8042.8    | 31.4    | 256.0       |
| P84103                            | SRSF3        | 3               | 3325.3    | 818.3   | 4.1         | 4               | 3630.5    | 40.6    | 89.5        |
| Q16629                            | SRSF7        | 5               | 3744.0    | 846.5   | 4.4         | 4               | 4127.3    | 23.9    | 172.9       |
| P62995                            | TRA2B        | 11              | 6638.2    | 1129.5  | 5.9         | 10              | 16863.9   | 14.2    | 1188.9      |
| <b>Ribosomal proteins</b>         |              |                 |           |         |             |                 |           |         |             |
| P62241                            | RPS8         | 9               | 3592.5    | 1124.1  | 3.2         | 7               | 2126.1    | 119.9   | 17.7        |
| <b>Other RNA binding proteins</b> |              |                 |           |         |             |                 |           |         |             |
| Q15717                            | ELAVL1       | 16              | 5595.7    | 661.7   | 8.5         | 9               | 6187.4    | 51.6    | 119.9       |
| Q12905                            | ILF2         | 24              | 7513.3    | 457.9   | 16.4        | 31              | 12309.0   | 57.4    | 214.6       |
| Q12906                            | ILF3         | 41              | 11003.5   | 894.7   | 12.3        | 40              | 20821.8   | 44.1    | 471.9       |
| Q07666                            | KHDRBS1      | 14              | 11612.9   | 1495.6  | 7.8         | 10              | 37656.6   | 189.5   | 198.7       |
| P43243                            | MATR3        | 34              | 8839.2    | 569.3   | 15.5        | 21              | 6177.7    | 29.5    | 209.8       |
| Q9UKM9                            | RALY         | 15              | 13029.4   | 938.6   | 13.9        | 10              | 10403.6   | 41.7    | 249.6       |

**Supplementary Table S1.** List of APOBEC3B partner candidates identified in both AMO1 and RPMI8226 cells by LC-MS/MS immunoprecipitation. Unique proteins detected in mass spectrometric analysis of myeloma cell line immunoprecipitate. Only proteins with unique peptide count (95% confidence)  $\geq 2$ , relative abundance  $\geq 2000$  and fold change  $\geq 2$  in both datasets are shown.

# Supplementary Figure S5

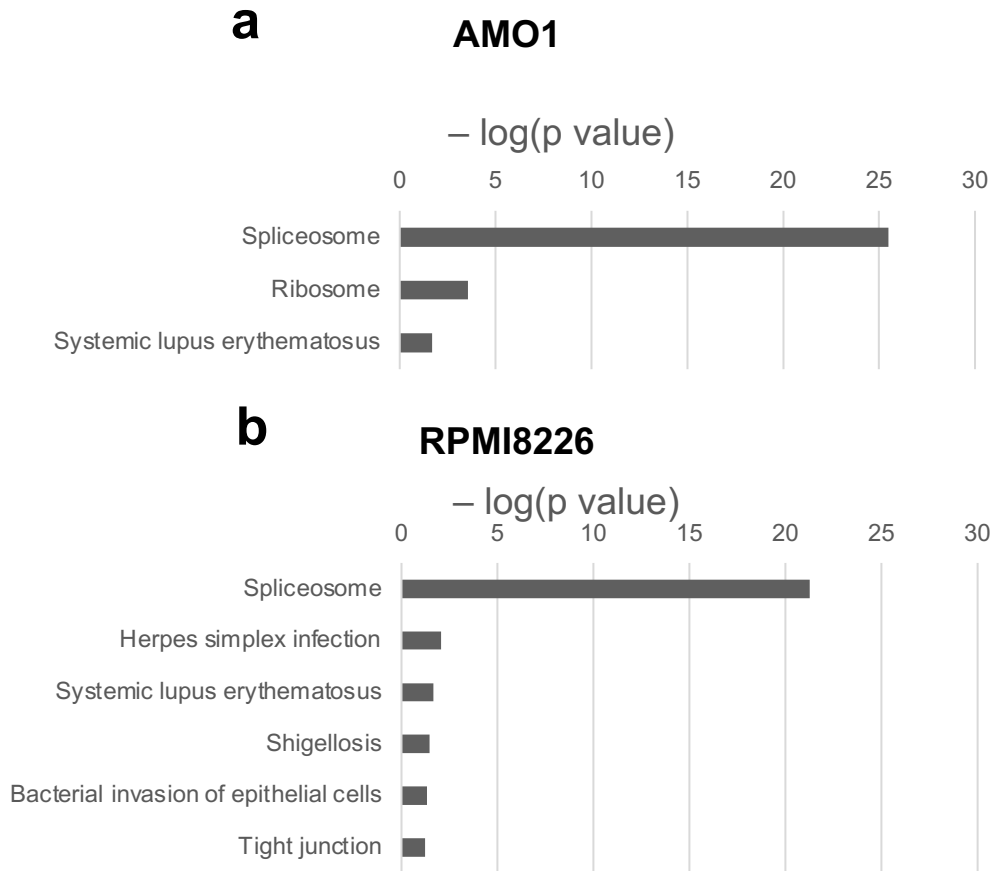

**Supplementary Figure S5.** Pathway analysis of putative A3B-interacting proteins. KEGG pathway analysis revealed that A3B-interacting protein candidates belong to the spliceosome and the ribosome. 55 interacting protein candidates identified in AMO1 (a) and 51 candidates in RPMI8226 (b) cells were analysed.

# Supplementary Figure S6

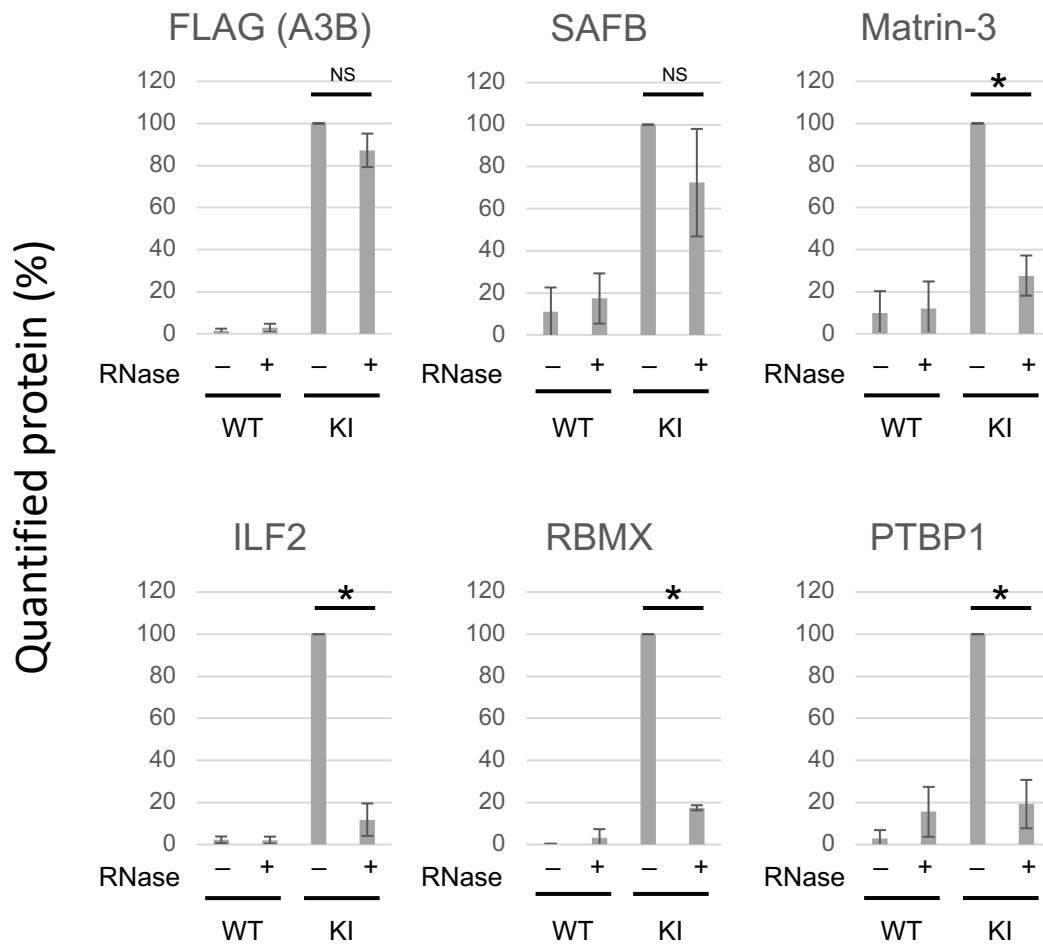

**Supplementary Figure S6.** Quantification of band intensity of FLAG-IP lysates from AMO1 cells. Quantification of immunoblot band intensity in three biologically independent experiments (including those shown in Figure 2) of representative interacting protein candidates in AMO1 cells. All the values are normalized by those of AMO1-KI without RNase. Values are means  $\pm$  standard deviations (error bar). Asterisks (\*) show statistically significant difference ( $p < 0.05$ ).

# Supplementary Figure S7

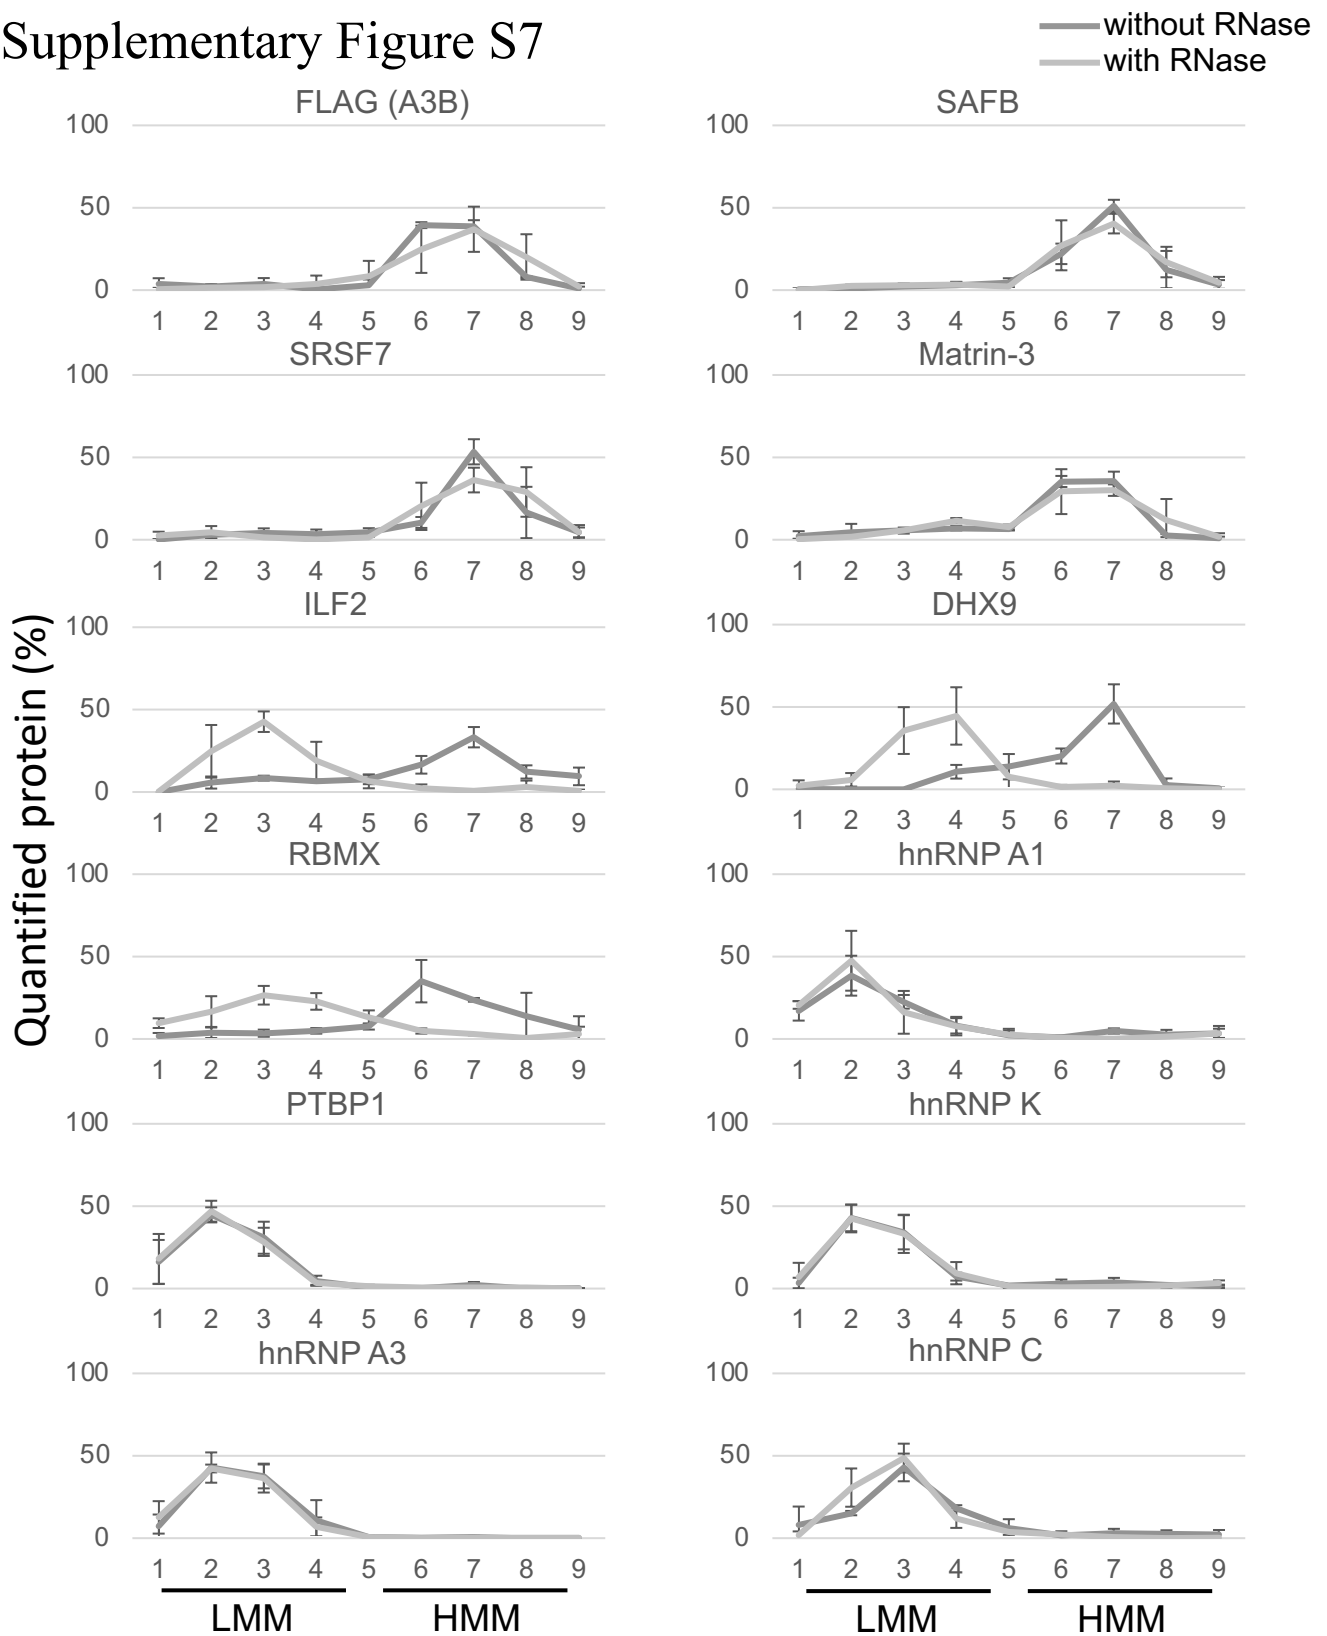

**Supplementary Figure S7.** Histograms of the intensity of the bands in each density gradient fraction from AMO1 cells, as shown in Figure 3. The band intensity of three biologically independent Western blot experiments was quantified (including those shown in Figure 3). Values are means  $\pm$  standard deviations (error bar). *LMM*, low molecular mass. *HMM*, high molecular mass.

# Supplementary Figure S8

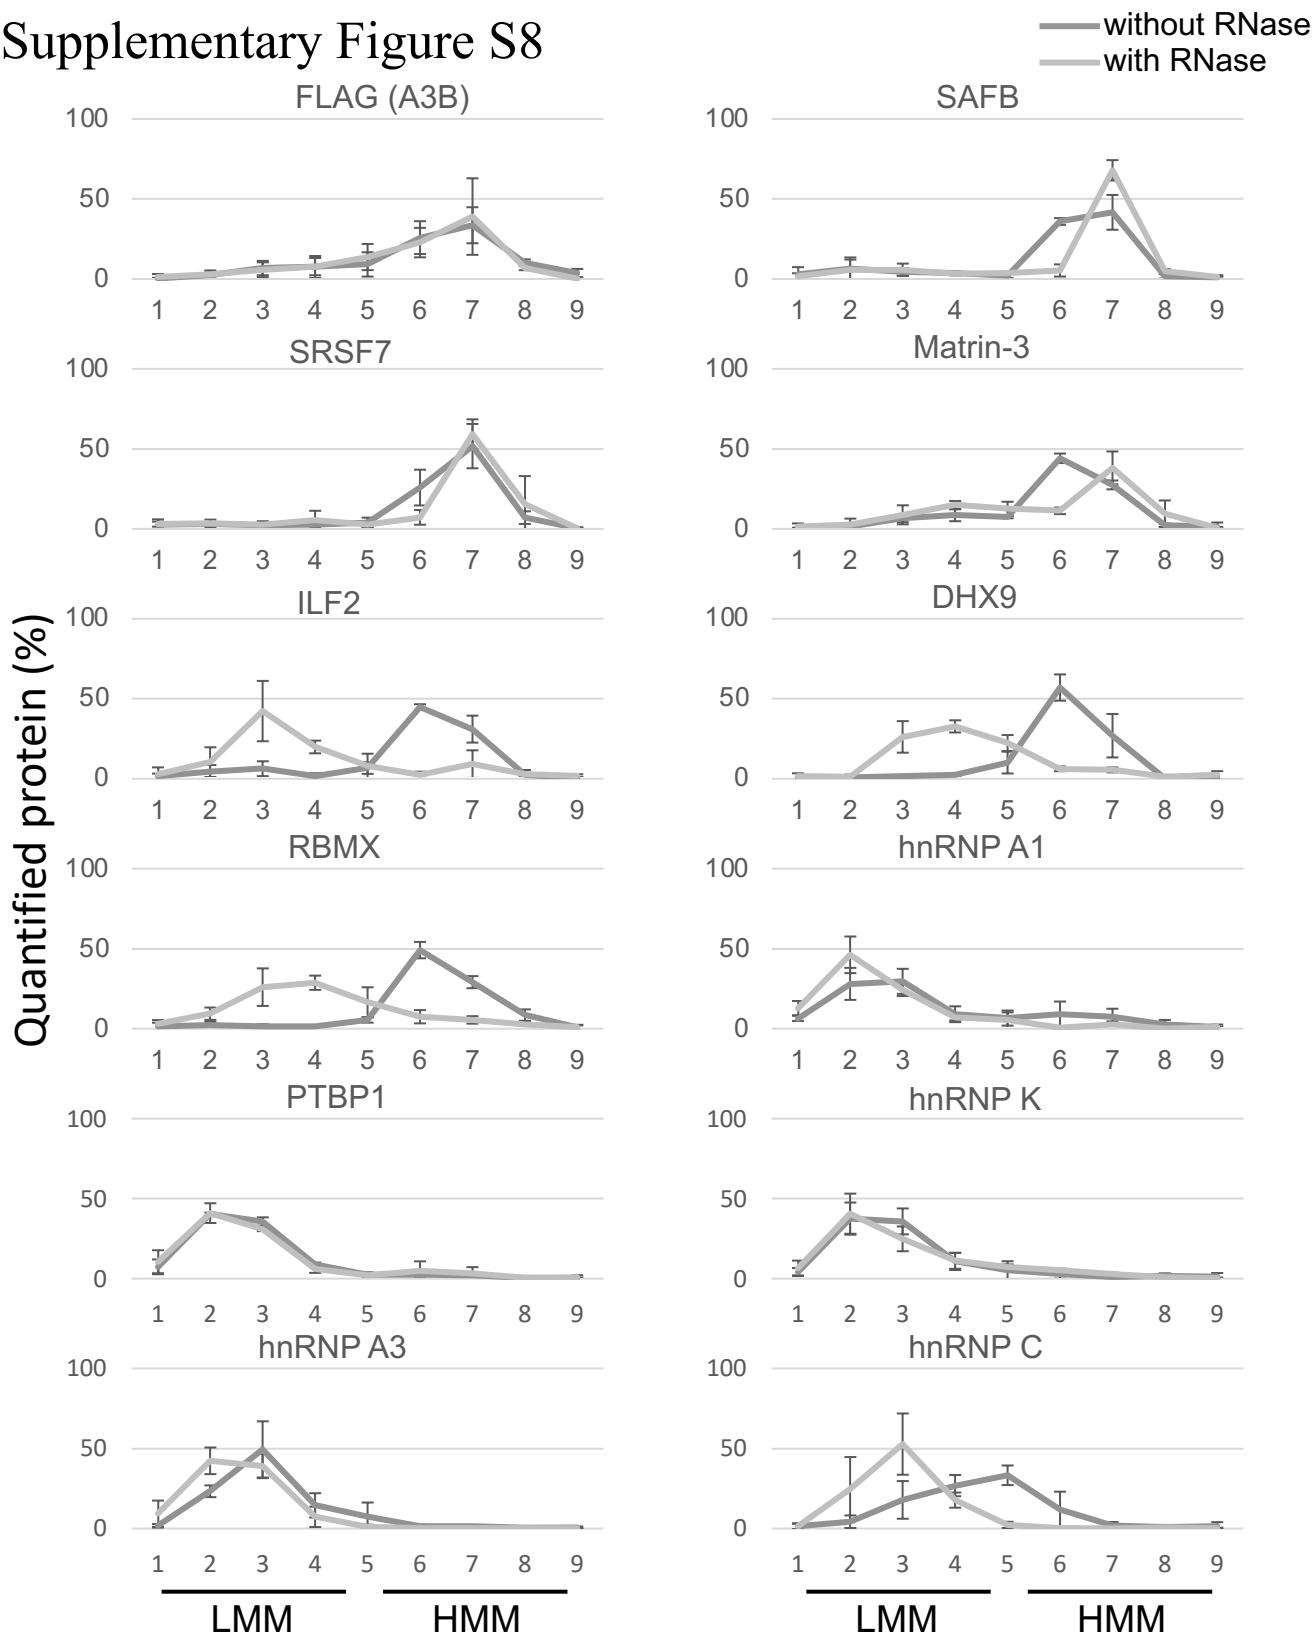

**Supplementary Figure S8.** Histograms of the intensity of the bands in each density gradient fraction from RPMI8226 cells, as shown in Figure 3. The band intensity of three biologically independent Western blot experiments was quantified (including those shown in Figure 3). Values are means  $\pm$  standard deviations (error bar). *LMM*, low molecular mass. *HMM*, high molecular mass.

# Supplementary Figure S9

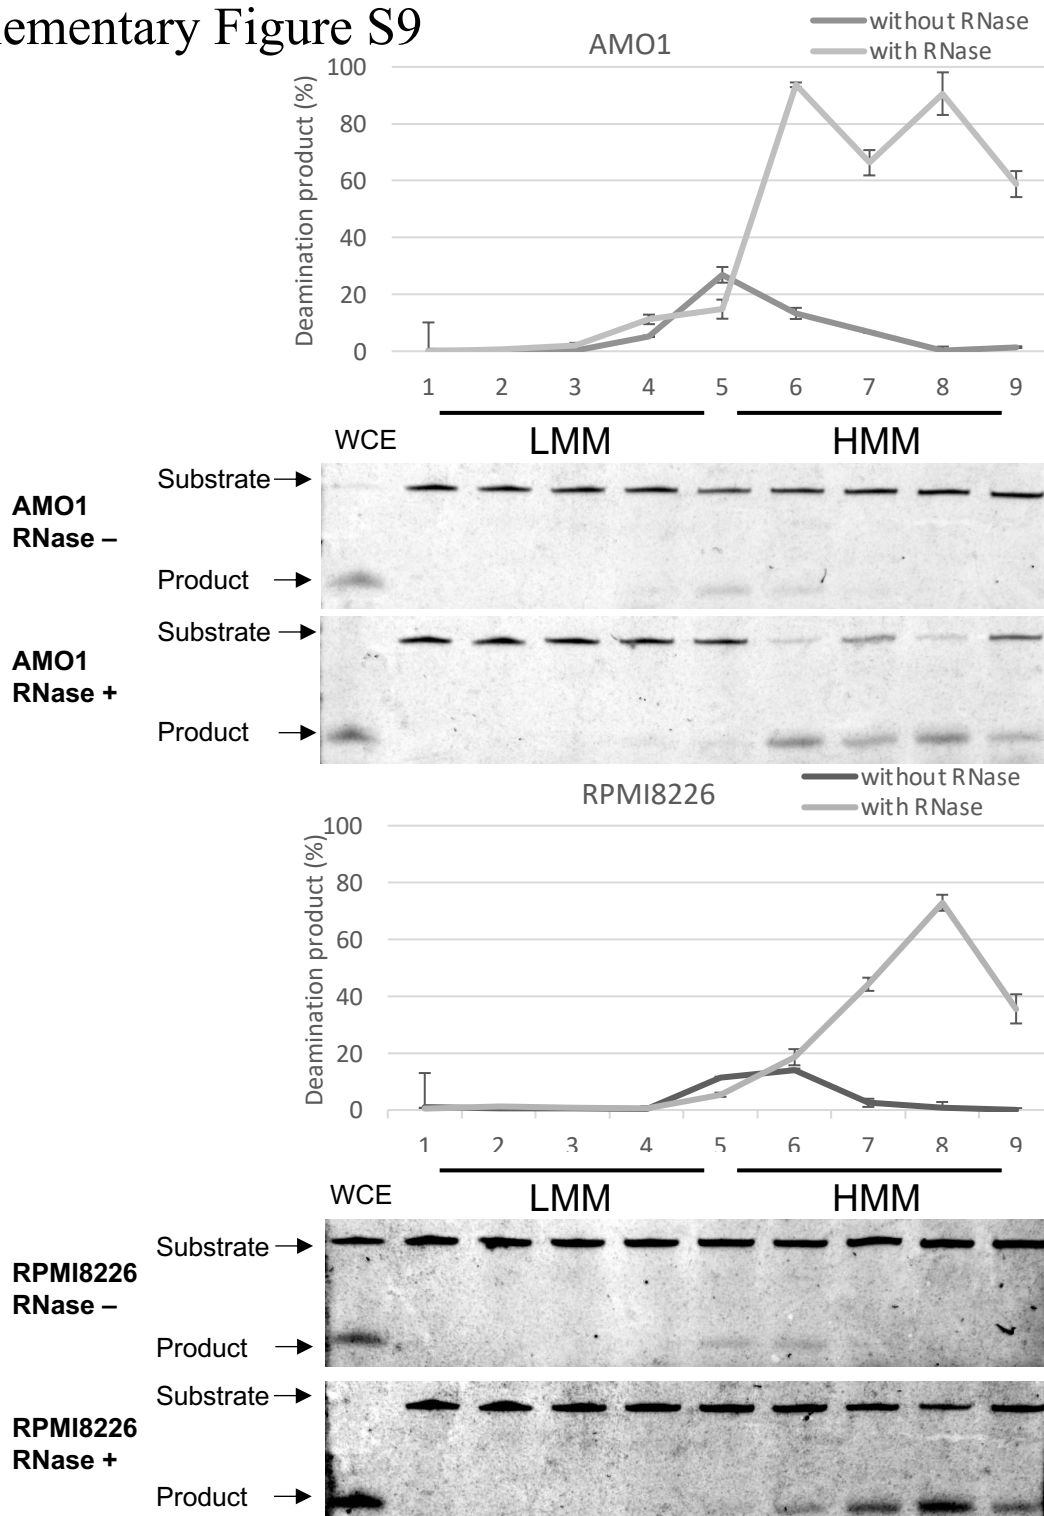

**Supplementary Figure S9.** RNase treatment enhances A3B cytidine deaminase activity in high-density fractions. The fractions obtained after density gradient sedimentation (Figure 3) were subjected to gel-based CDA assays. Deaminated/total (deaminated and aminated) percentage of product in three biologically independent experiments was calculated using the ImageJ software. Values are means  $\pm$  standard deviations (error bar). *LMM*, low molecular mass. *HMM*, high molecular mass. Original gels are presented in Supplementary Figure S17.

# Supplementary Figure S10

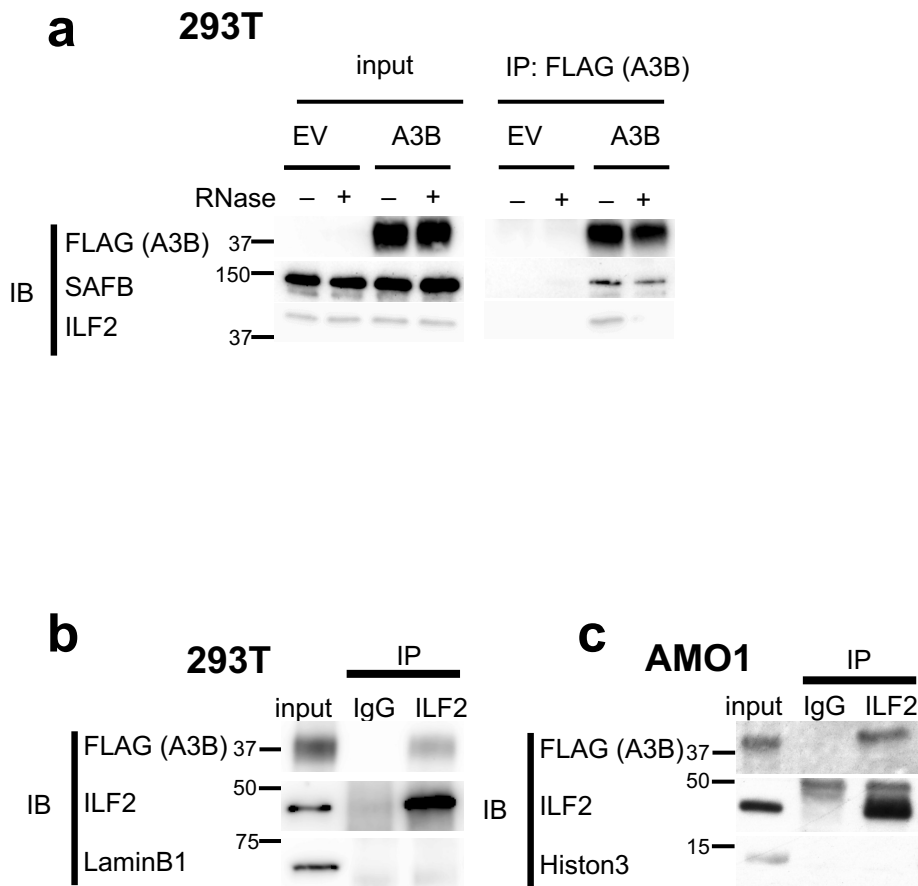

**Supplementary Figure S10.** Validation of the interaction with A3B by co-immunoprecipitation and reciprocal co-immunoprecipitation of nuclear extracts. (a, b) HEK293T cells were transfected with expression vectors for A3B-3 × FLAG. Nuclear extracts from these cells were co-immunoprecipitated with anti-FLAG (a) or anti-ILF2 (b) antibodies, with or without RNase A, followed by immunoblotting with the indicated antibodies. (c) Nuclear extracts from AMO1-KI cells were co-immunoprecipitated with anti-ILF2 antibodies, with or without RNase A, followed by immunoblotting with the indicated antibodies. Images shown here are representative of three independent experiments. *EV*, empty vector. Original blots are presented in Supplementary Figure S18.



# Supplementary Figure S11

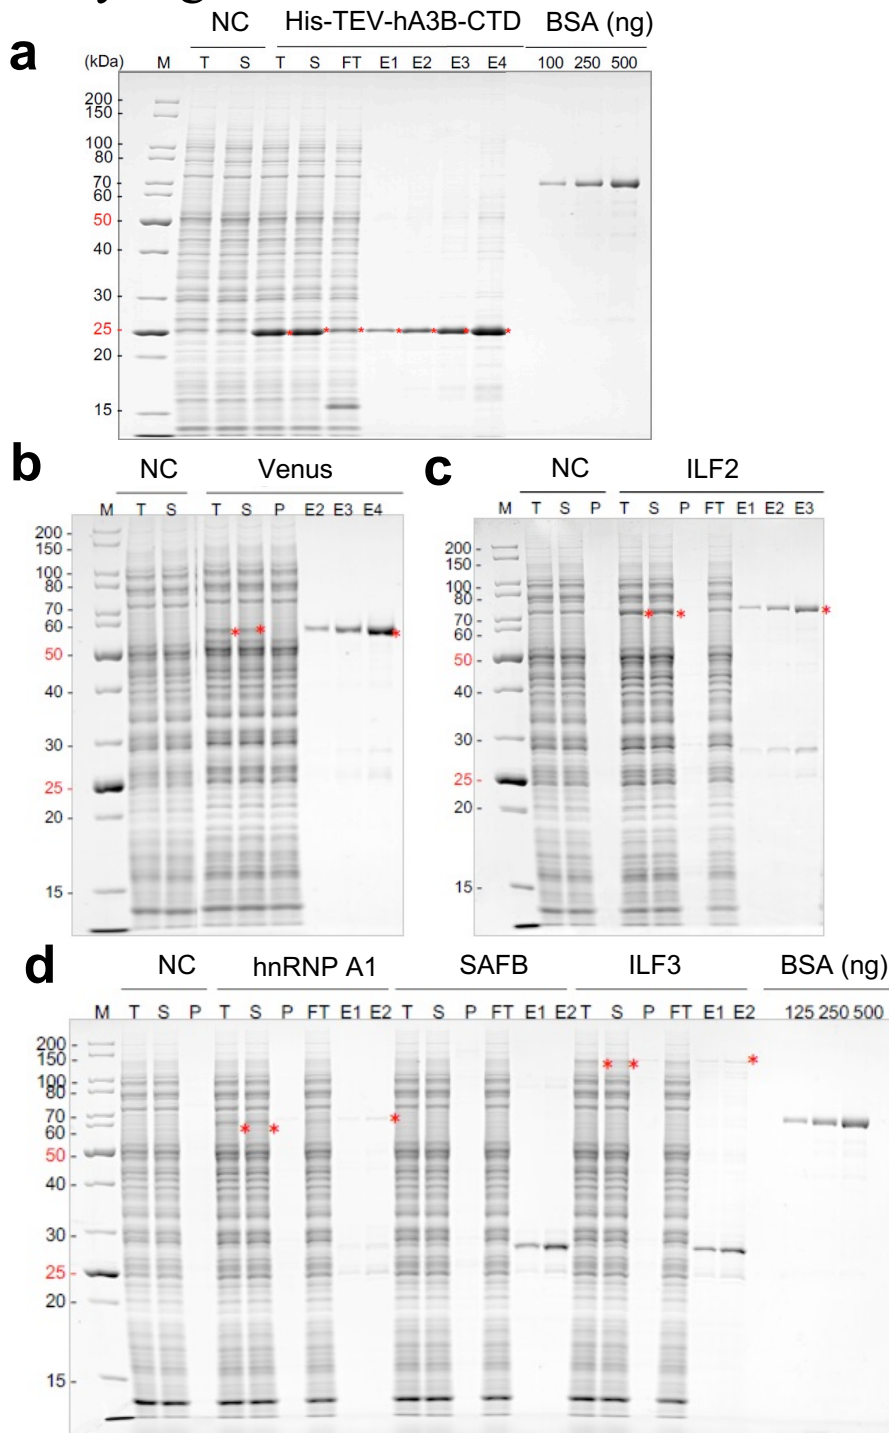

**Supplementary Figure S11.** Coomassie-stained gels illustrating the purity of A3B and ILF2 used in Supplementary Figure S12. SDS-PAGE followed by Coomassie staining was performed using purified (a) A3B, (b) Venus, (c) ILF2, (d) hnRNP A1, SAFB and ILF3. SAFB could not be purified. M, molecular weight marker. NC, negative control. T, total fraction. S, Supernatant fraction after centrifugation of the total fraction. P, Precipitation fraction after centrifugation of the total fraction. FT, Flow Through fraction. E, Eluent (E1, 0.625  $\mu$ L. E2, 1.25  $\mu$ L. E3, 2.5  $\mu$ L, E4, 5  $\mu$ L). \* Detected protein.

# Supplementary Figure S12

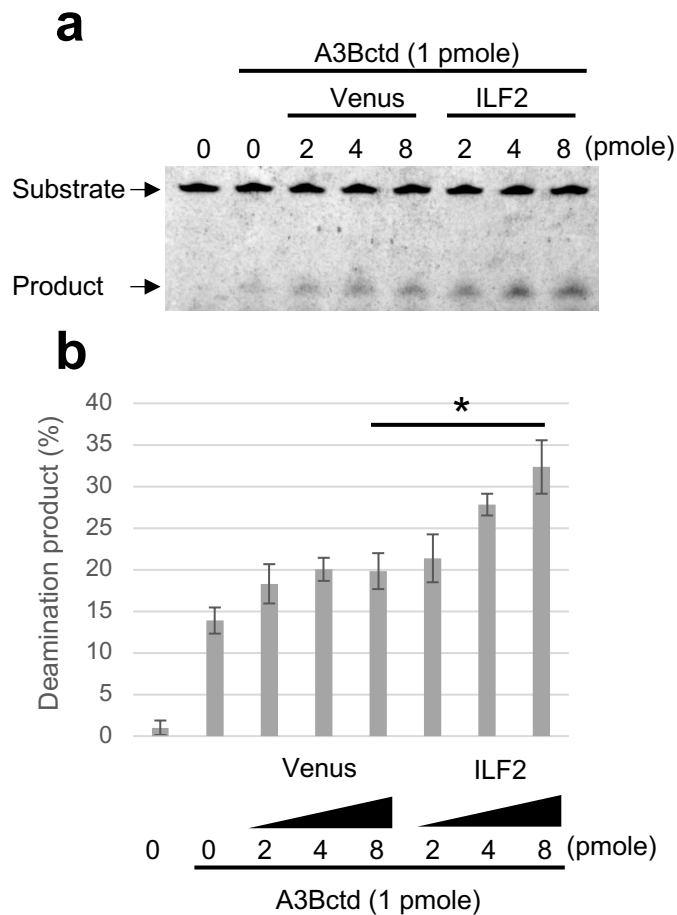

**Supplementary Figure S12.** A3B cytidine deaminase activity was enhanced by purified ILF2. (a) Gel-based CDA assay using purified proteins. Representative TBE-urea PAGE result is shown. (b) Quantification of the cytidine deaminase activity data in three biologically independent experiments. Values are means  $\pm$  standard deviations (error bar). Original gel is presented in Supplementary Figure S19.

# Supplementary Figure S13-1

## Original blots for Figure 2 (AMO1)

IB: FLAG

|       | input |    | IP: FLAG (A3B) |    |
|-------|-------|----|----------------|----|
|       | WT    | KI | WT             | KI |
| RNase | -     | +  | -              | +  |

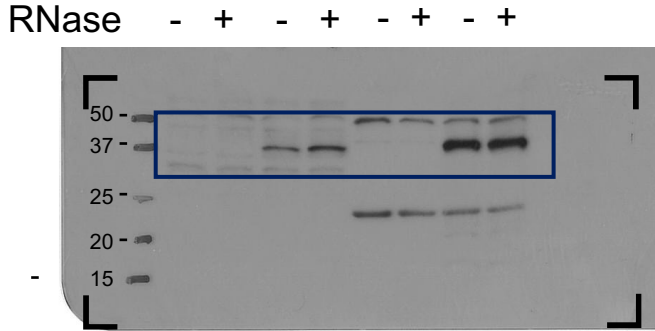

\* cut prior to hybridisation with the antibody

IB: SAFB

|       | input |    | IP: FLAG (A3B) |    |
|-------|-------|----|----------------|----|
|       | WT    | KI | WT             | KI |
| RNase | -     | +  | -              | +  |

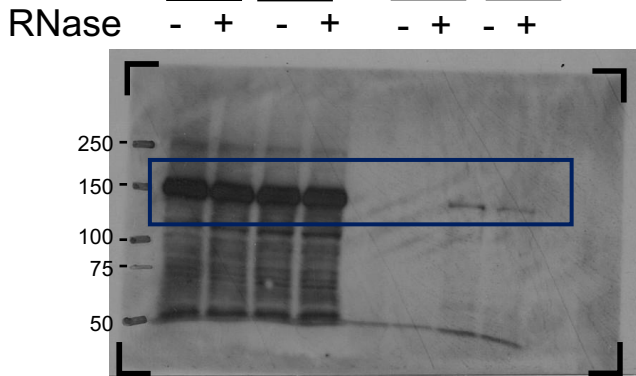

IB: SRSF7

|       | input |    | IP: FLAG (A3B) |    |
|-------|-------|----|----------------|----|
|       | WT    | KI | WT             | KI |
| RNase | -     | +  | -              | +  |

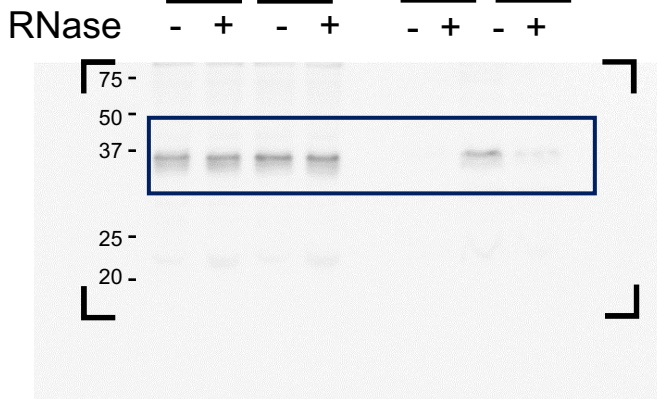

\* cut prior to hybridisation with the antibody

# Supplementary Figure S13-2

## Original blots for Figure 2 (AMO1)

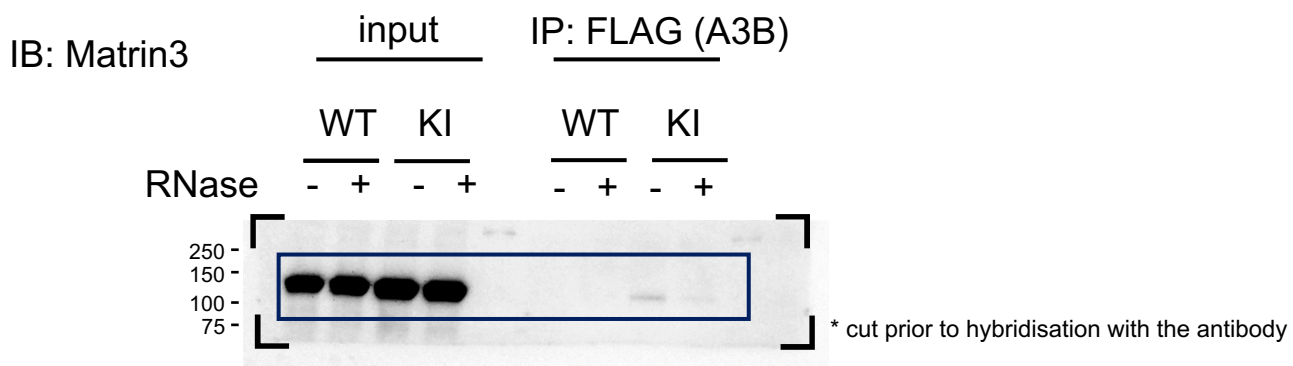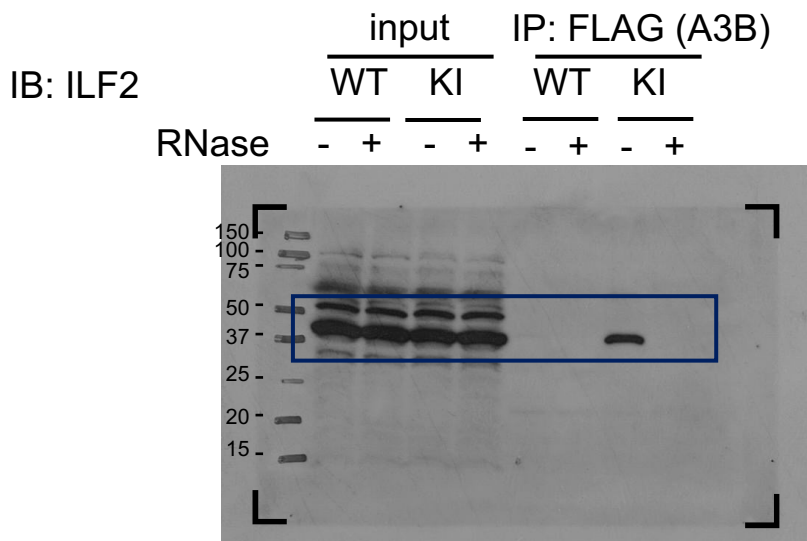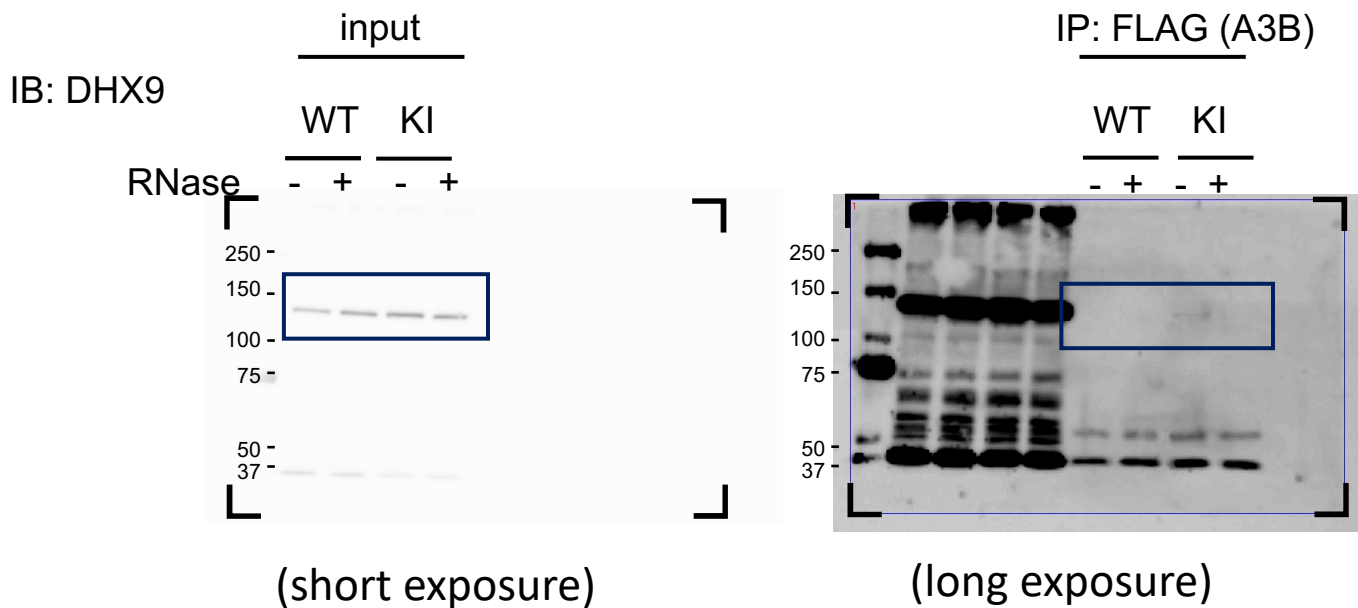

# Supplementary Figure S13-3

## Original blots for Figure 2 (AMO1)

IB: RBMX                      input                      IP: FLAG (A3B)

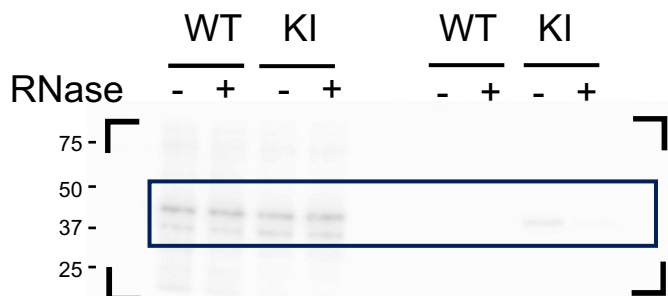

\* cut prior to hybridisation with the antibody

IB: hnRNP A1

input  
WT    KI  
 RNase    - +    - +

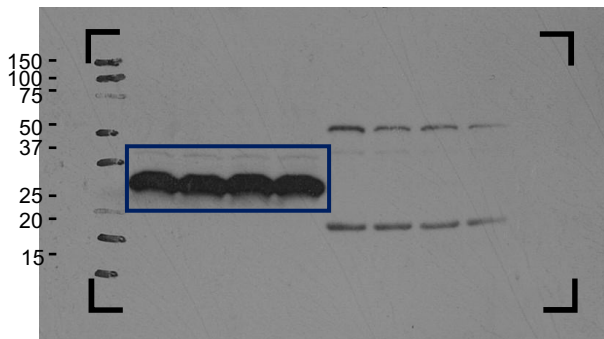

(short exposure)

IP: FLAG (A3B)

WT    KI  
 - +    - +

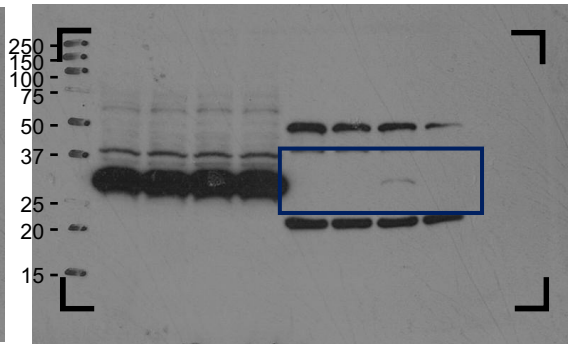

(long exposure)

IB: PTBP1

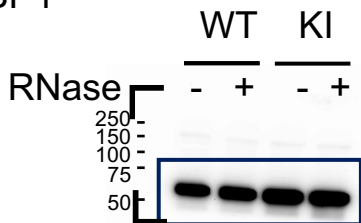

(short exposure)

IP: FLAG (A3B)  
WT    KI  
 - +    - +

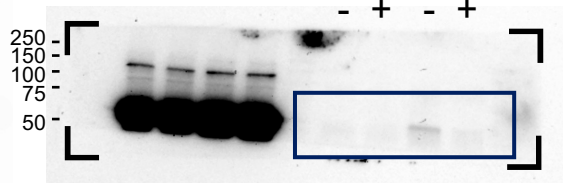

(long exposure)

\* cut prior to hybridisation with the antibody

# Supplementary Figure S13-4

## Original blots for Figure 2 (AMO1)

IB: hnRNP K

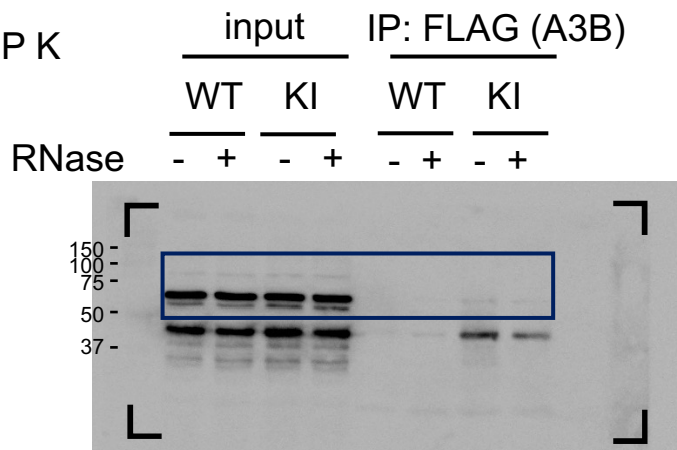

IB: hnRNP A3

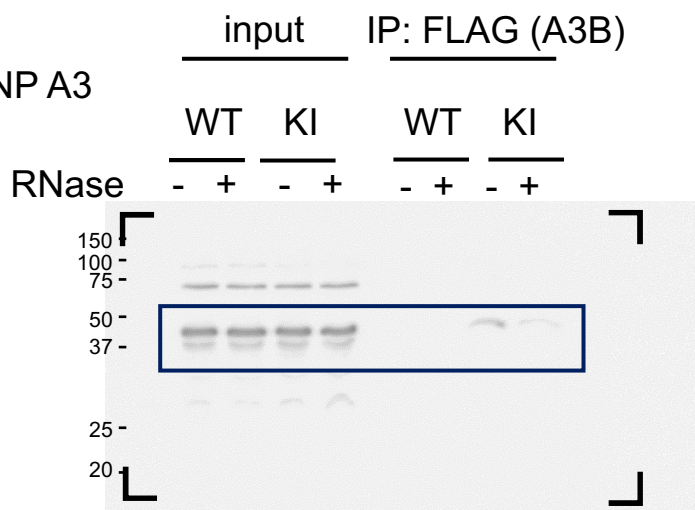

IB: hnRNP C

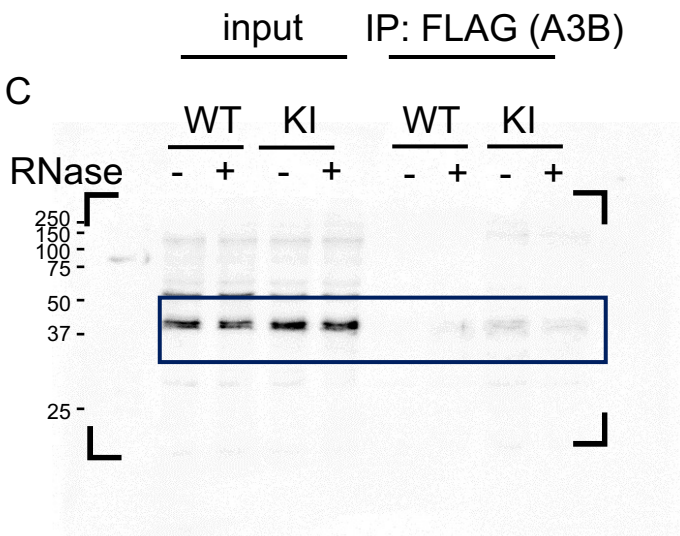

# Supplementary Figure S13-5

## Original blots for Figure 2 (RPMI8226)

IB: FLAG

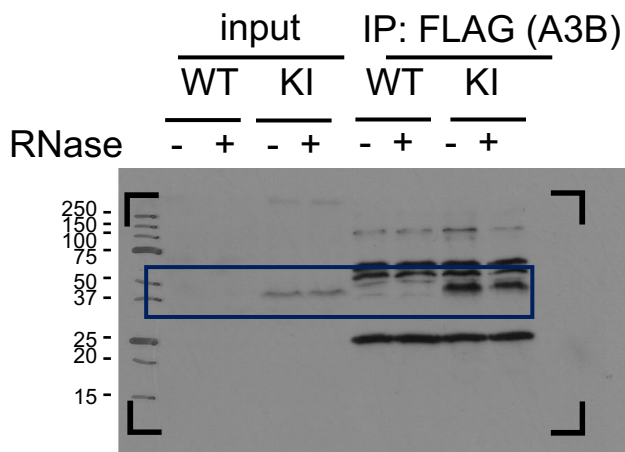

IB: SAFB

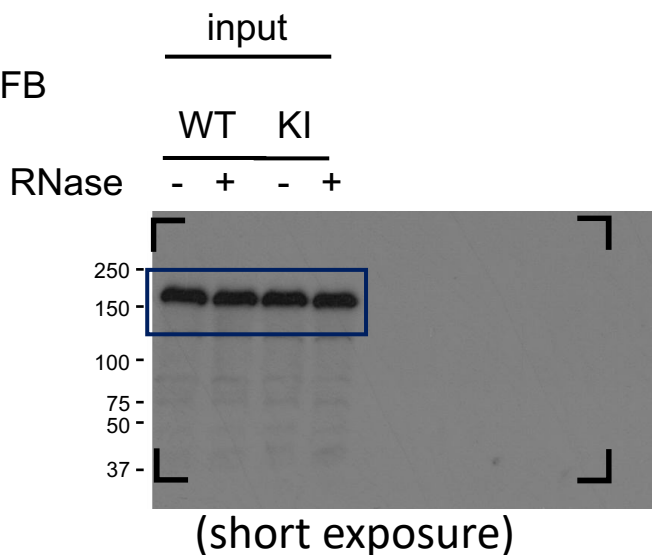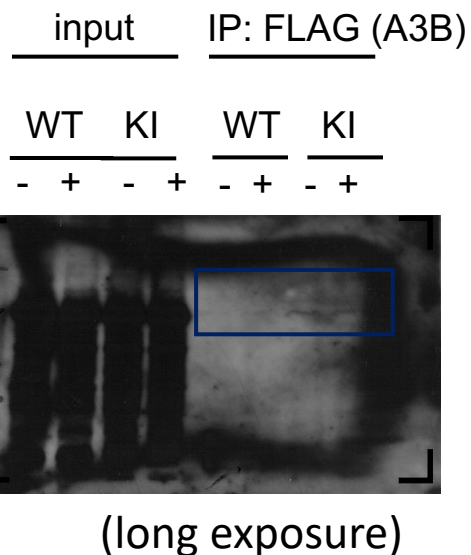

IB: SRSF7

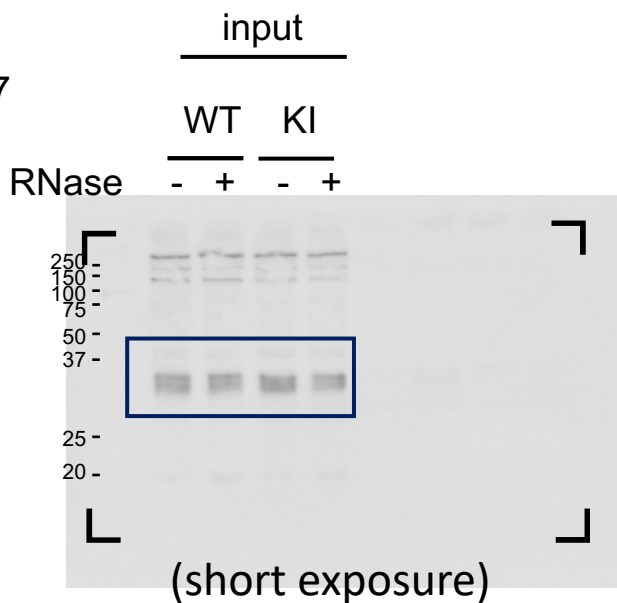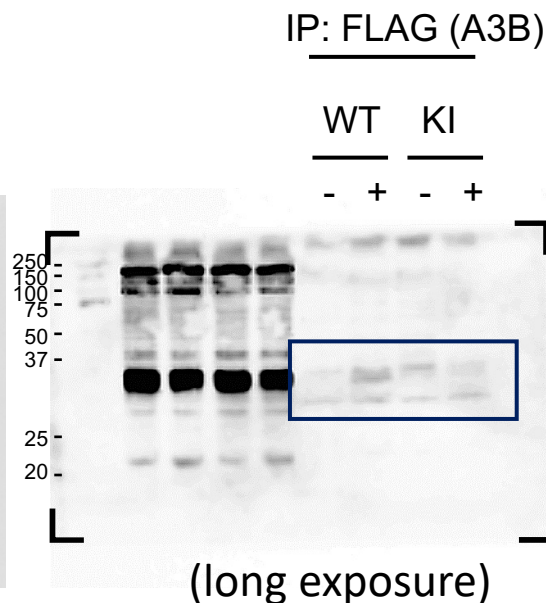



# Supplementary Figure S13-6

## Original blots for Figure 2 (RPMI8226)

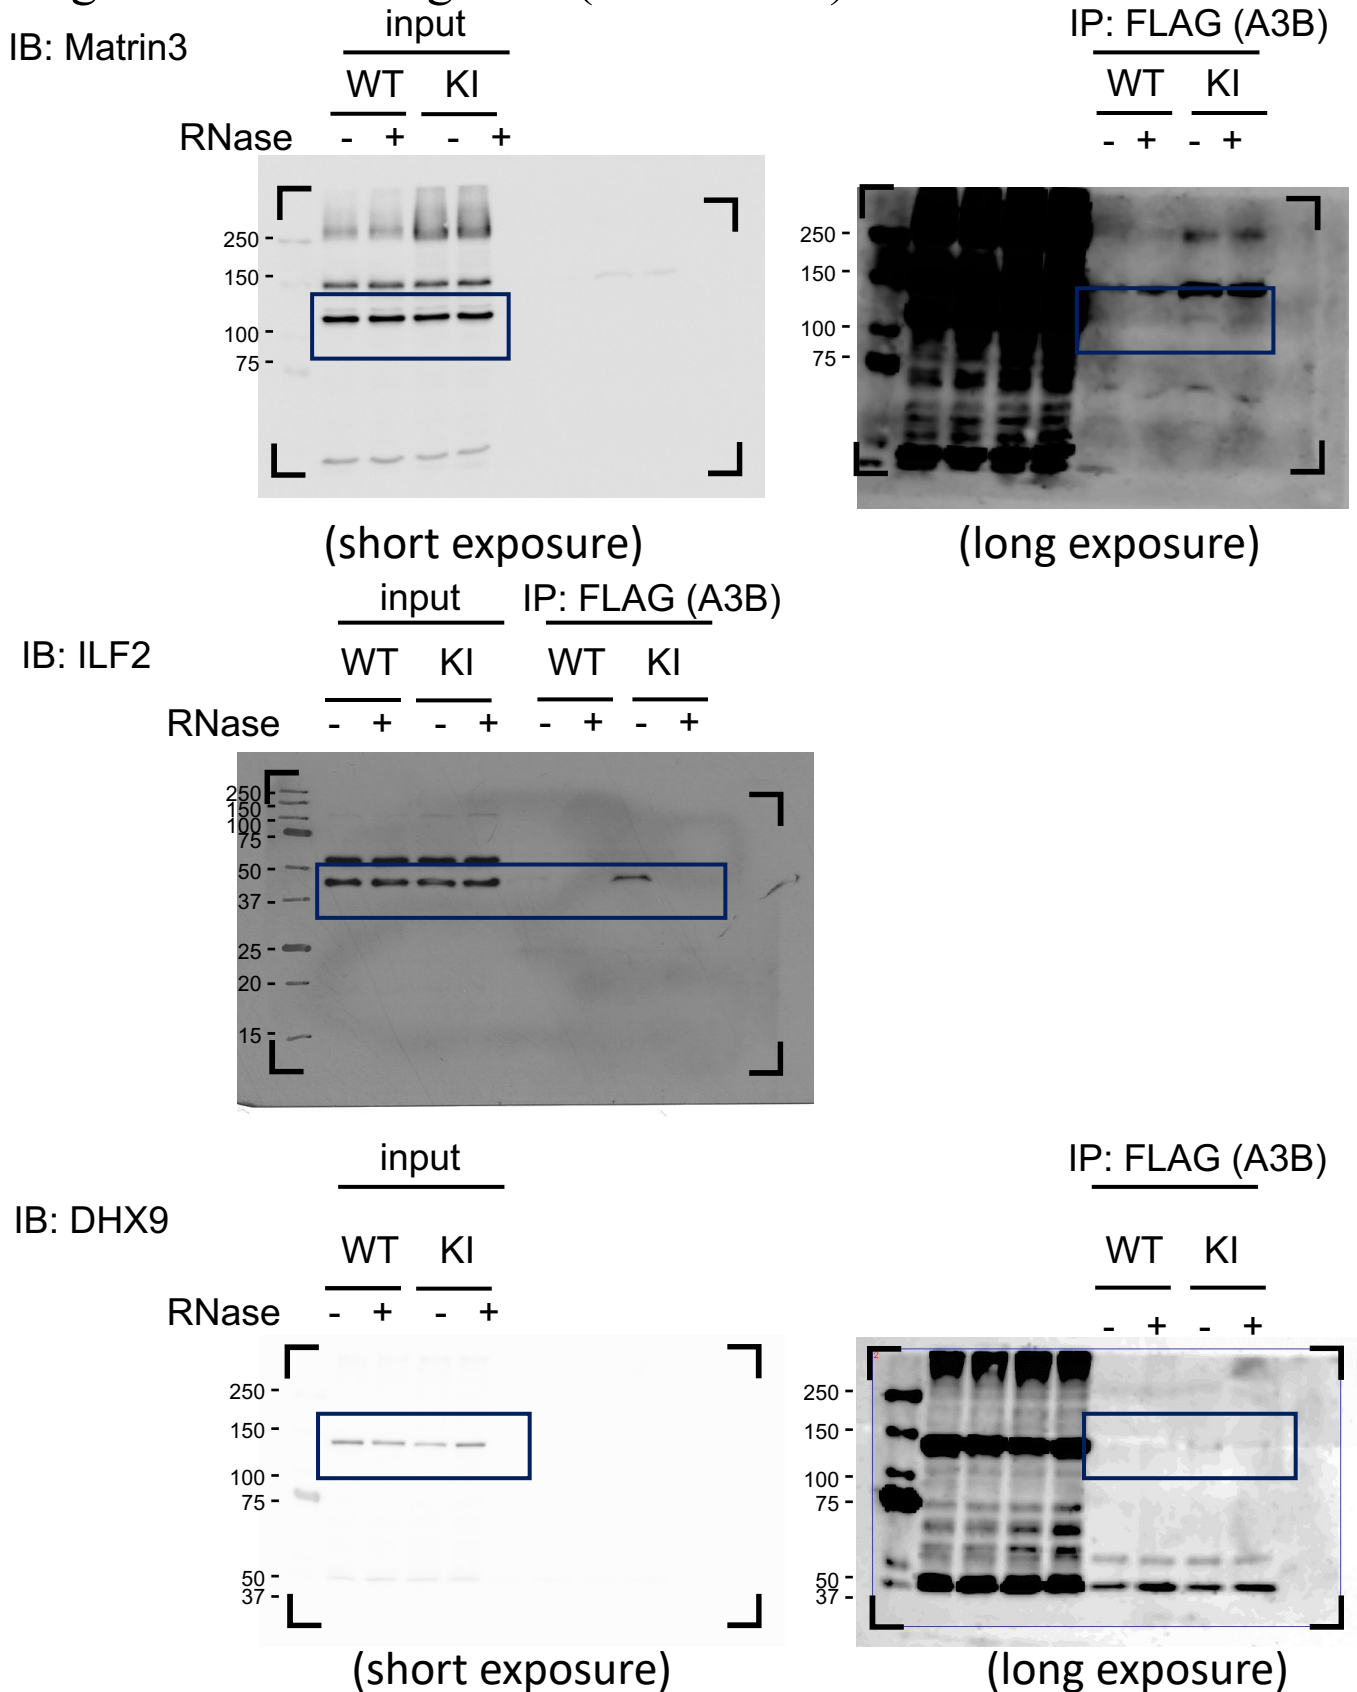



# Supplementary Figure S13-7

## Original blots for Figure 2 (RPMI8226)

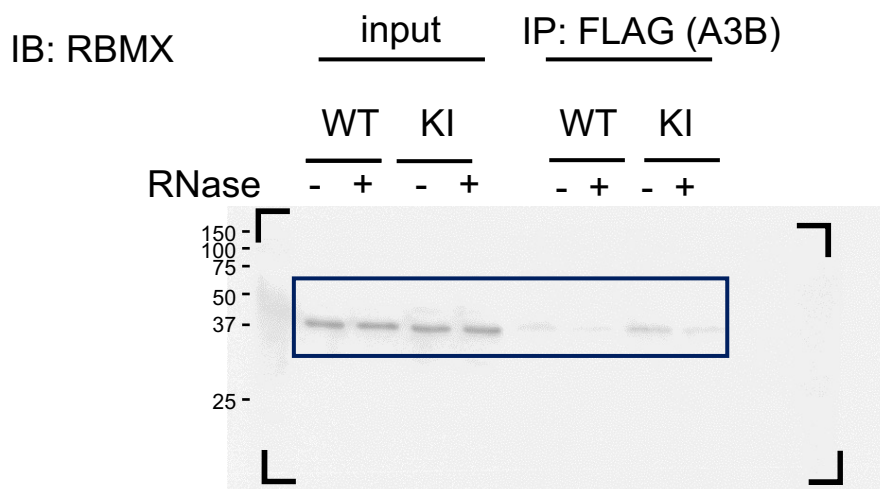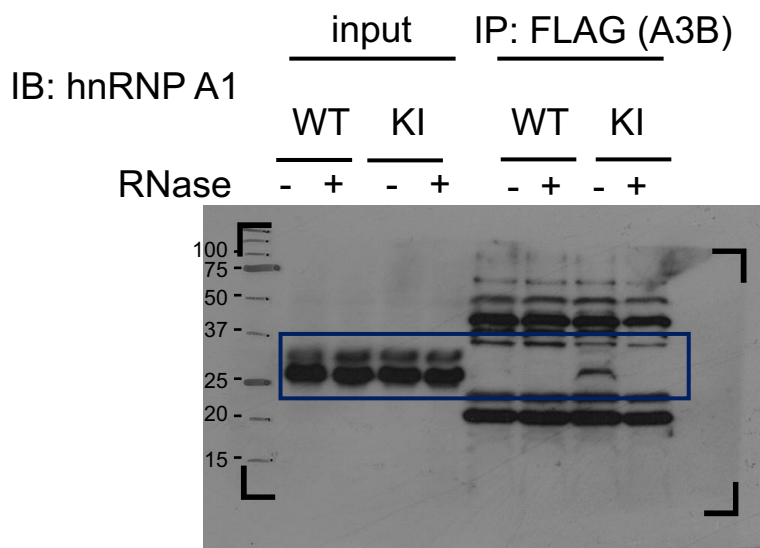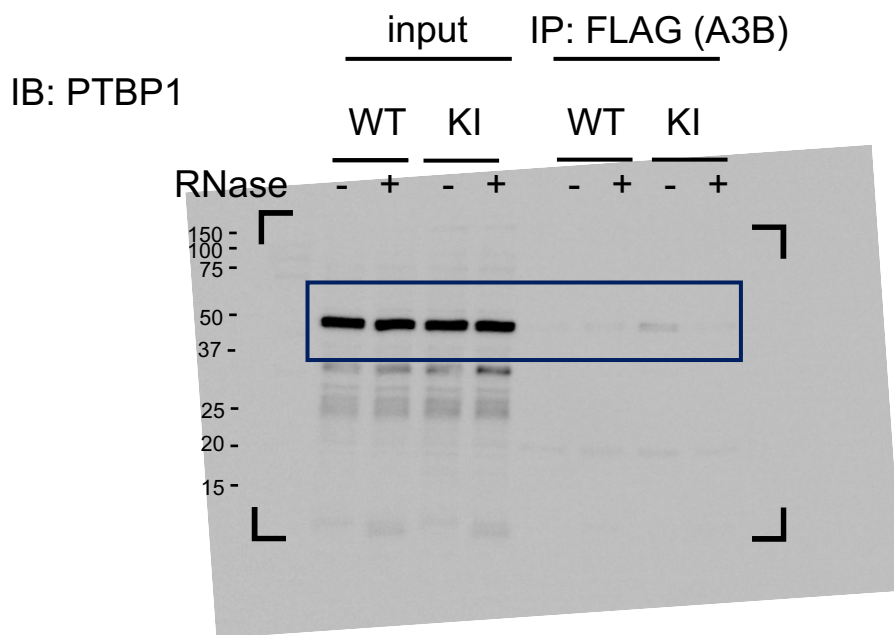

# Supplementary Figure S13-8

## Original blots for Figure 2 (RPMI8226)

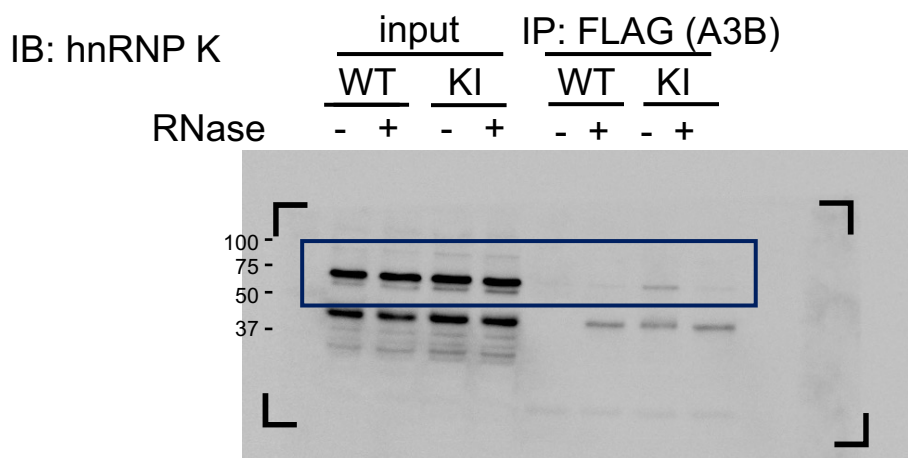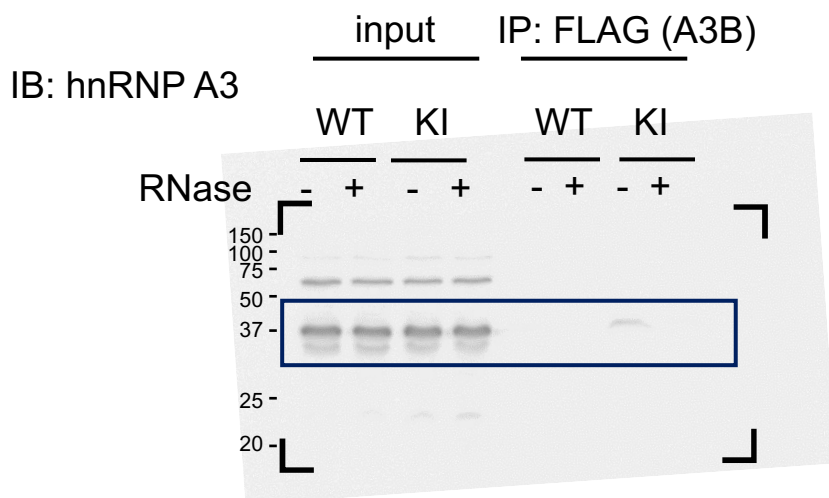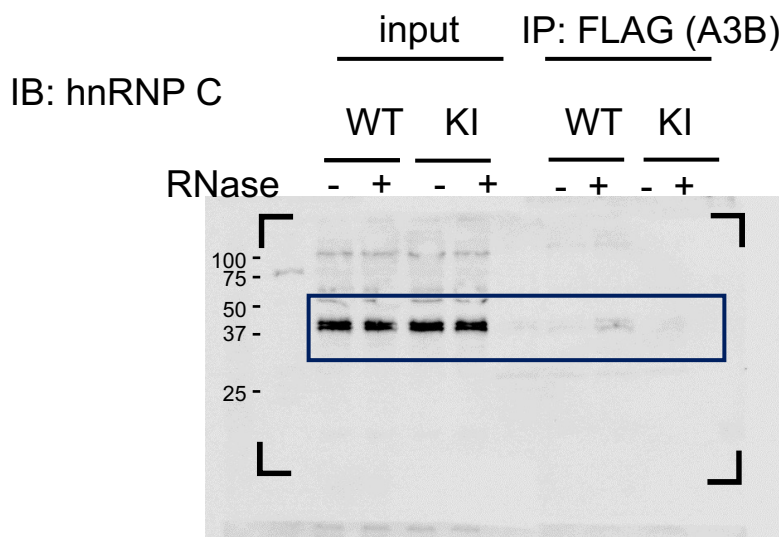

# Supplementary Figure S14-1

## Original blots for Figure 3 (AMO1)

RNase -

RNase +

Molecular Weight

Molecular Weight

IB: FLAG

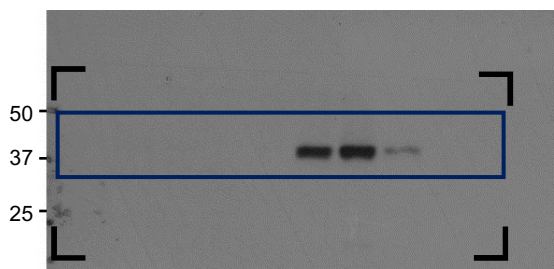

\* cut prior to hybridisation with the antibody

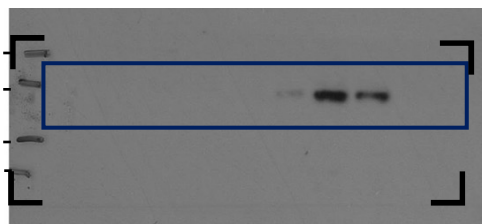

\* cut prior to hybridisation with the antibody

IB: SAFB

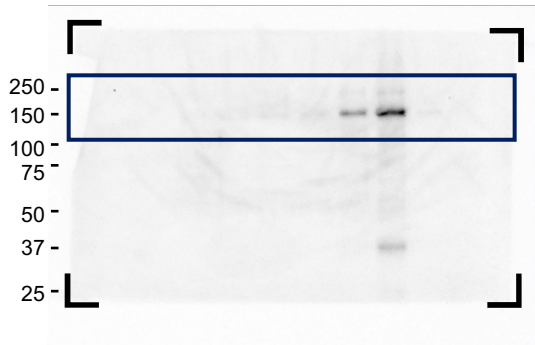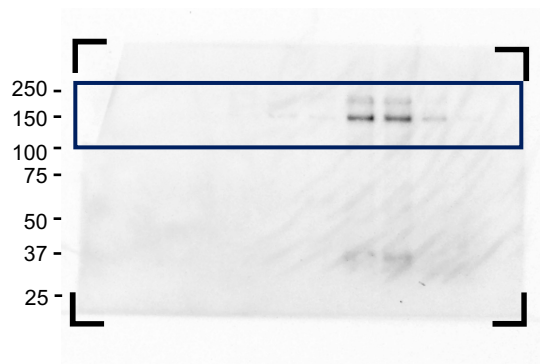

IB: SRSF7

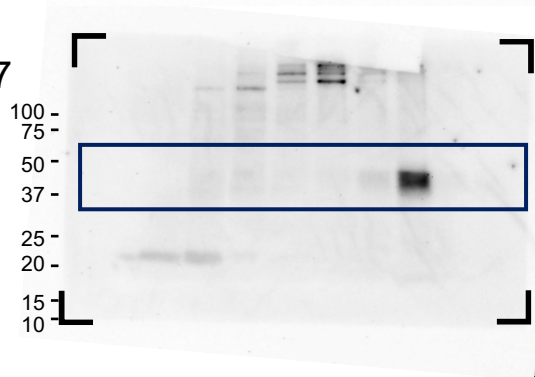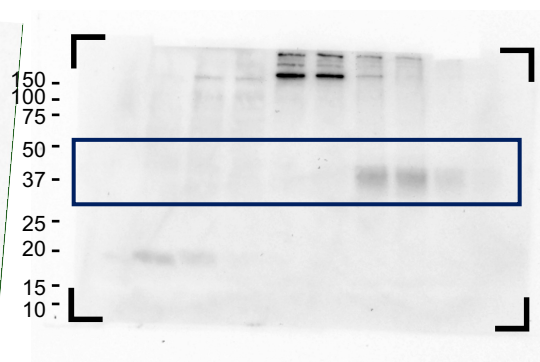

IB: Matrin3

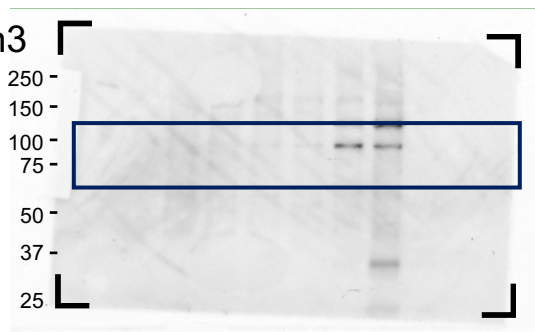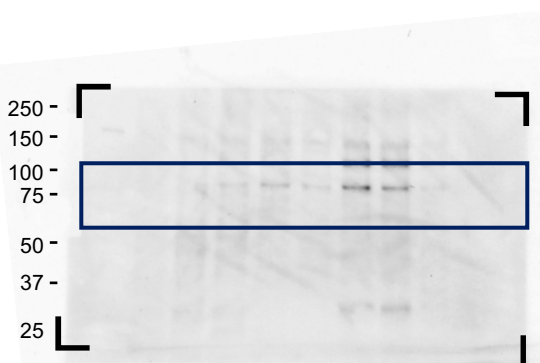

# Supplementary Figure S14-2

## Original blots for Figure 3 (AMO1)

**RNase -**  
Molecular Weight

**RNase +**  
Molecular Weight

IB: ILF2

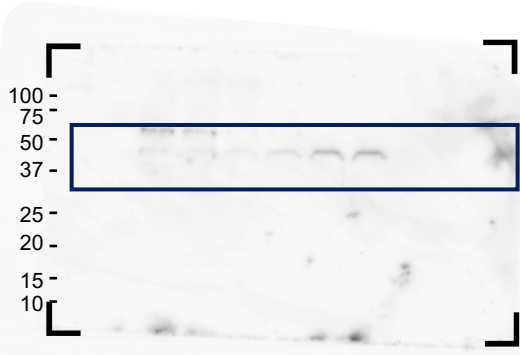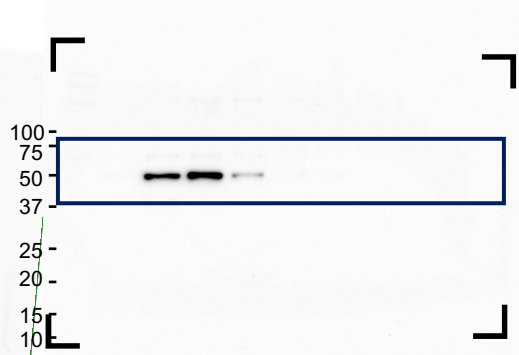

IB: DHX9

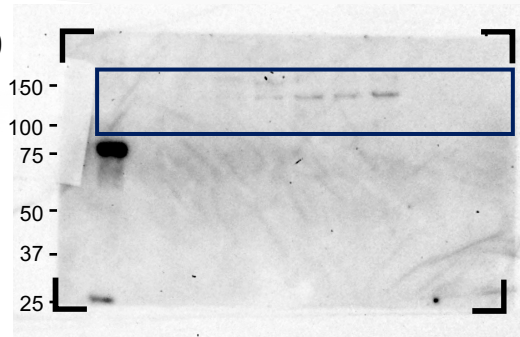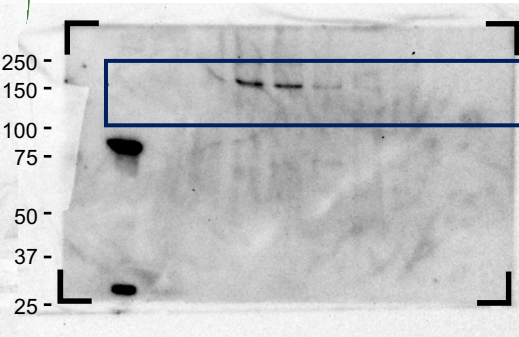

IB: RBMX

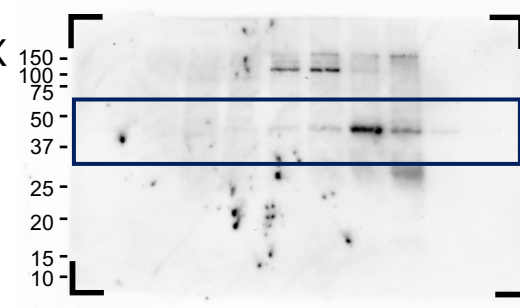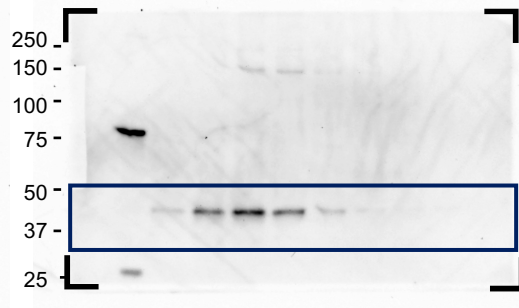

IB: hnRNP A1

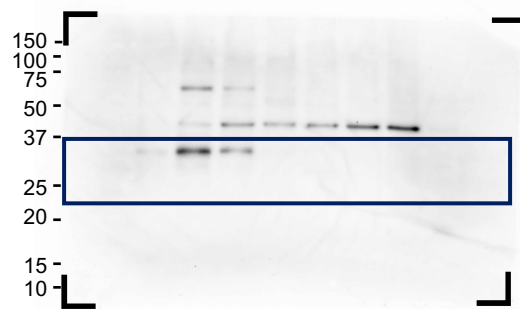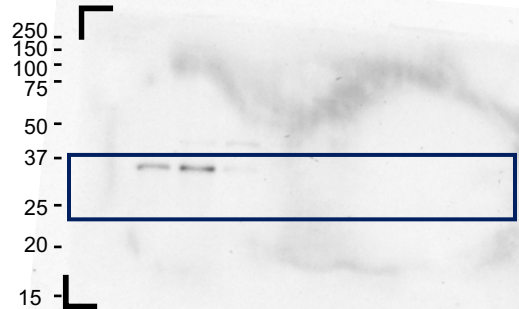

# Supplementary Figure S14-3

## Original blots for Figure 3 (AMO1)

RNase -  
Molecular Weight

RNase +  
Molecular Weight

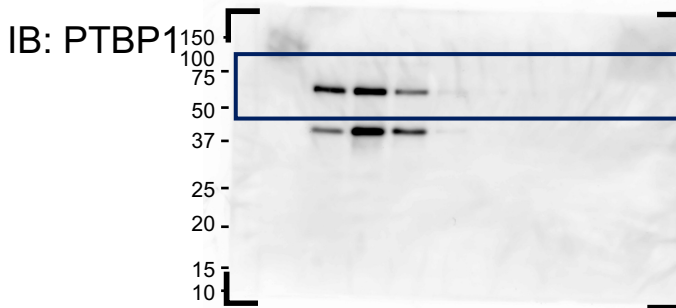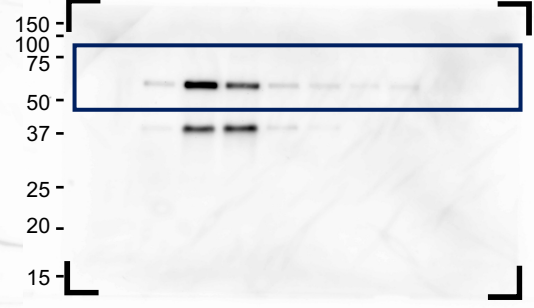

IB: hnRNP K

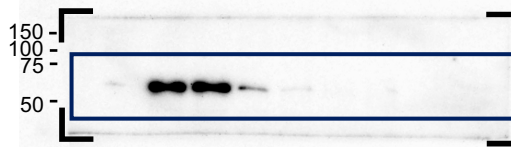

\* cut prior to hybridisation with the antibody

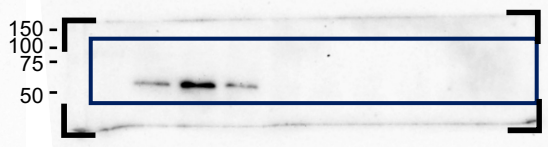

\* cut prior to hybridisation with the antibody

IB: hnRNP A3

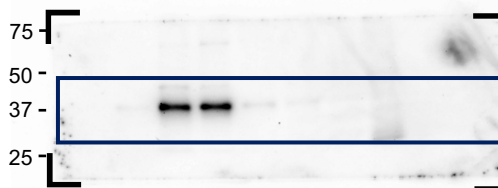

\* cut prior to hybridisation with the antibody

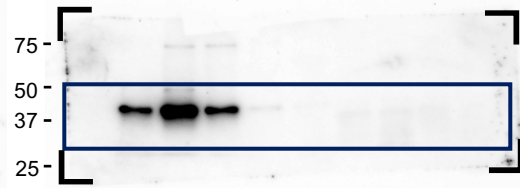

\* cut prior to hybridisation with the antibody

IB: hnRNP C

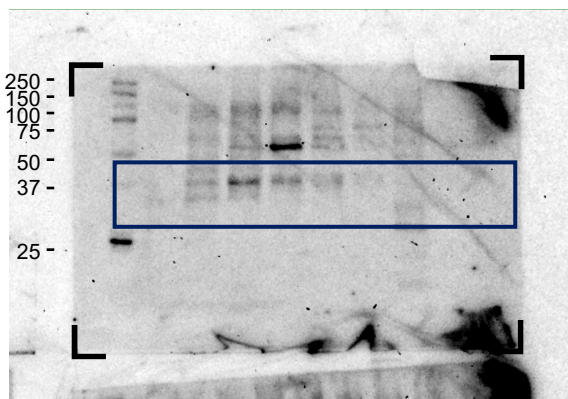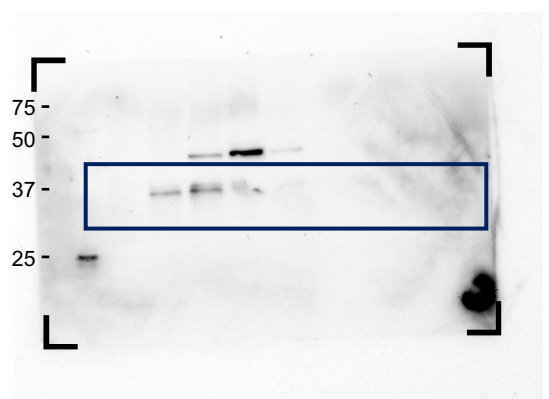



# Supplementary Figure S14-4

## Original blots for Figure 3 (RPMI8226)

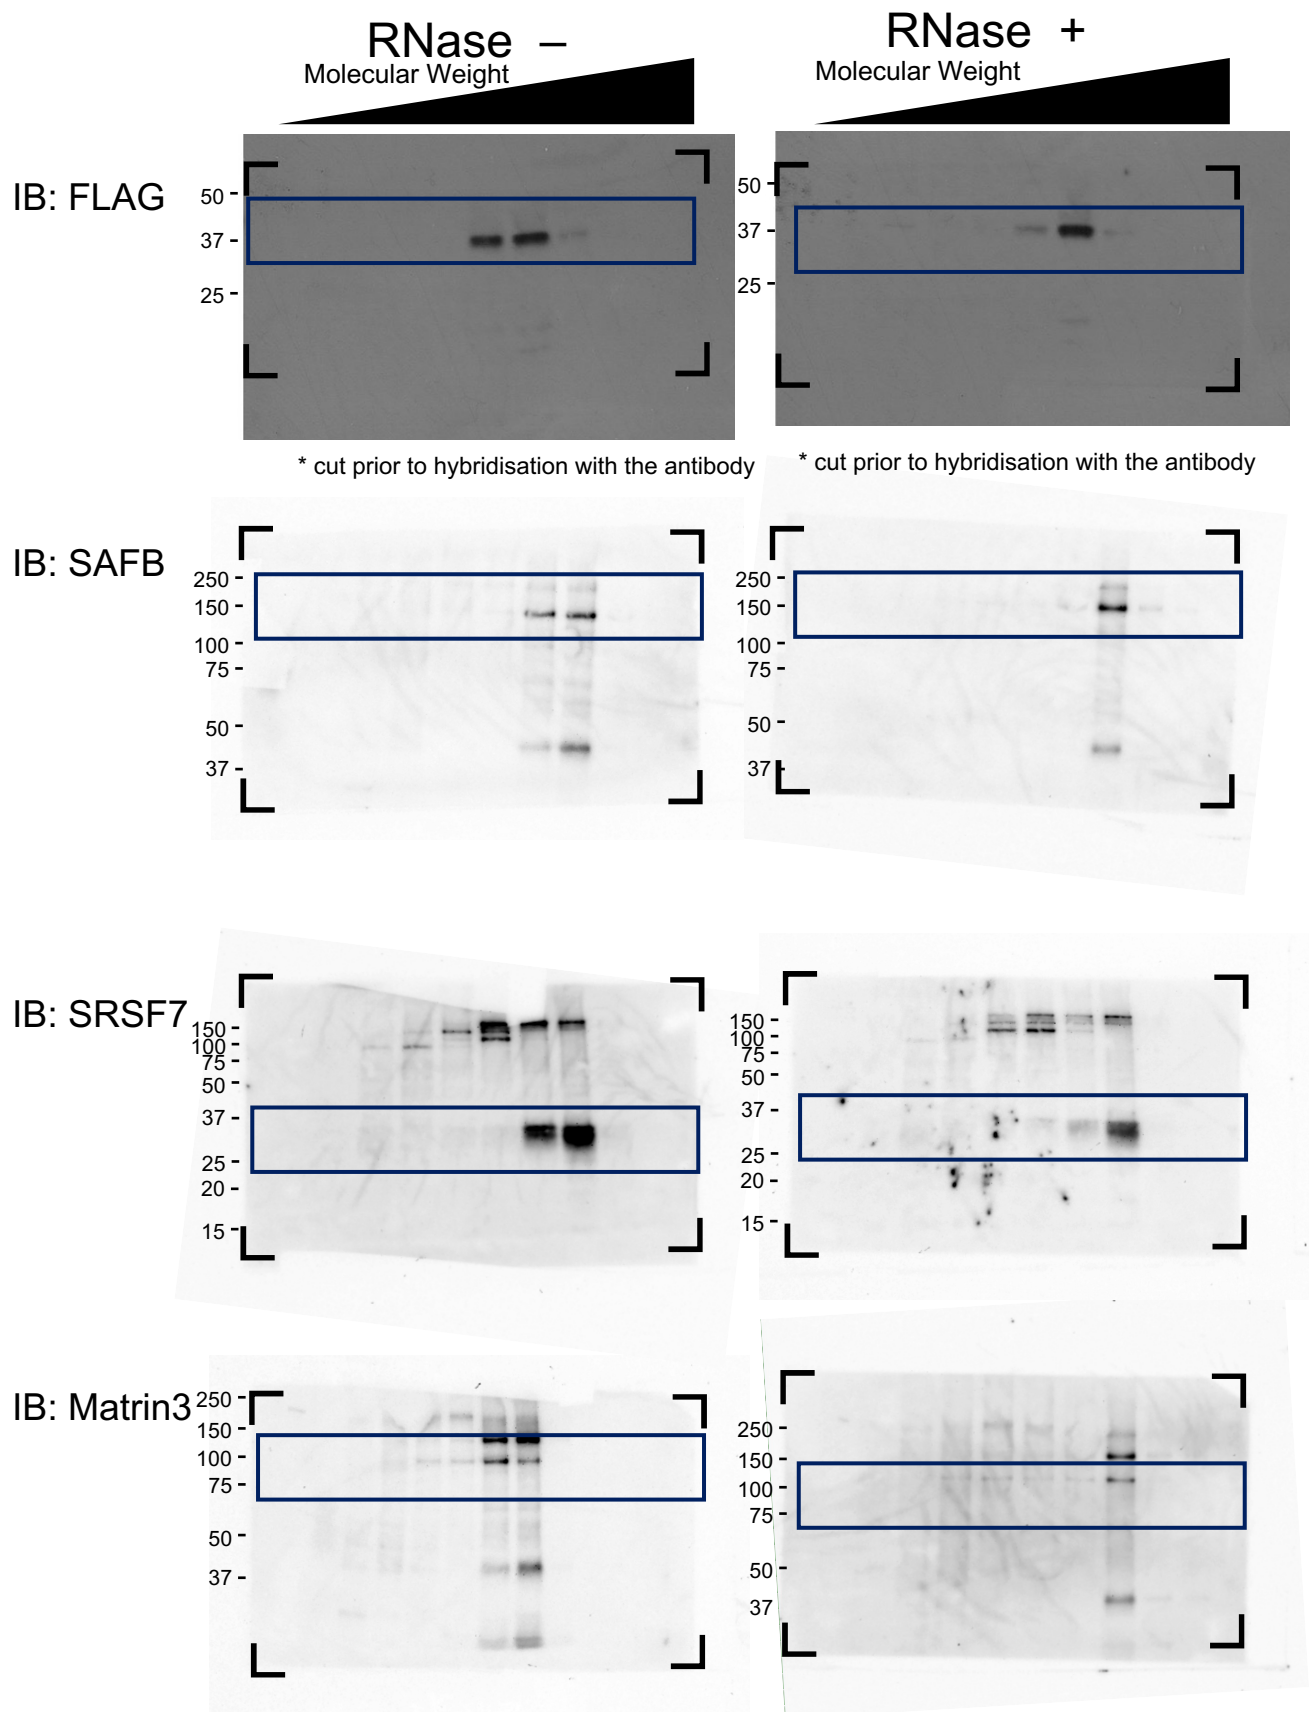

# Supplementary Figure S14-5

## Original blots for Figure 3 (RPMI8226)

RNase -  
Molecular Weight

RNase +  
Molecular Weight

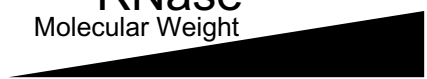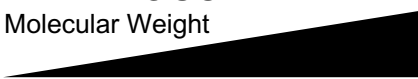

IB: ILF2

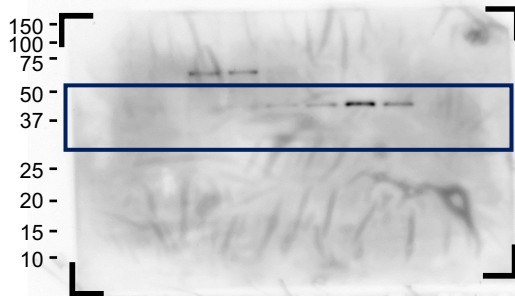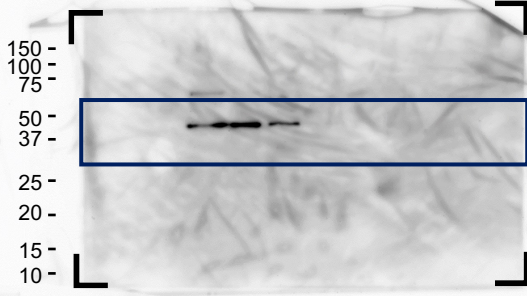

IB: DHX9

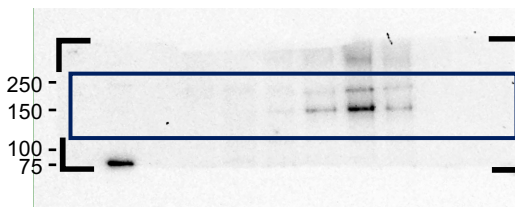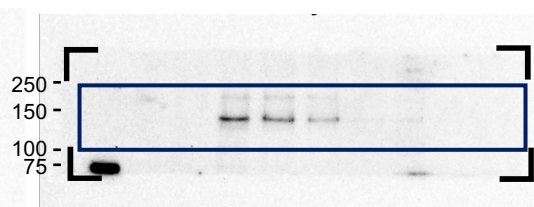

IB: RBMX

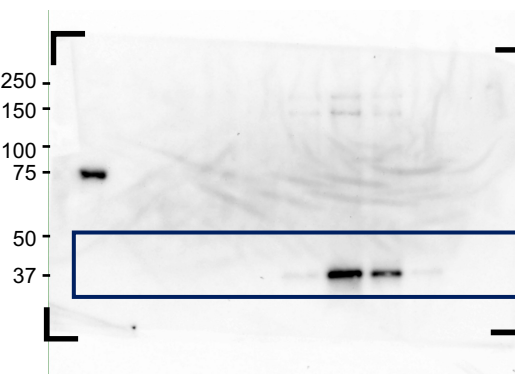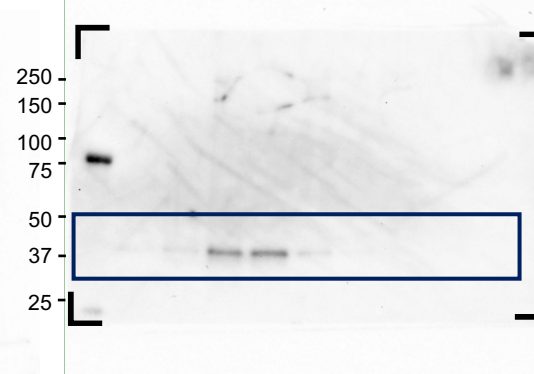

IB: hnRNP A1

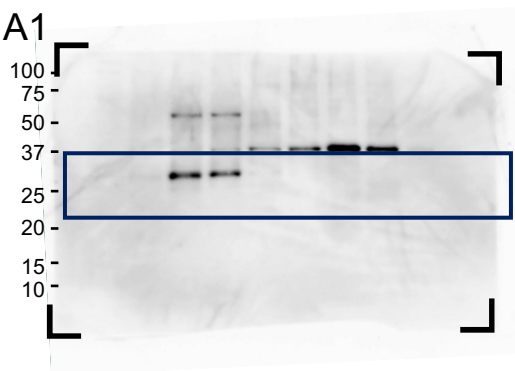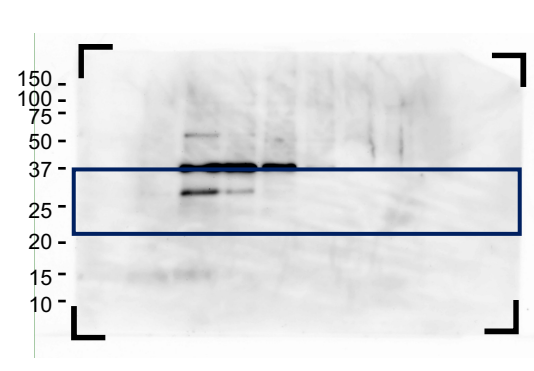

# Supplementary Figure S14-6

## Original blots for Figure 3 (RPMI8226)

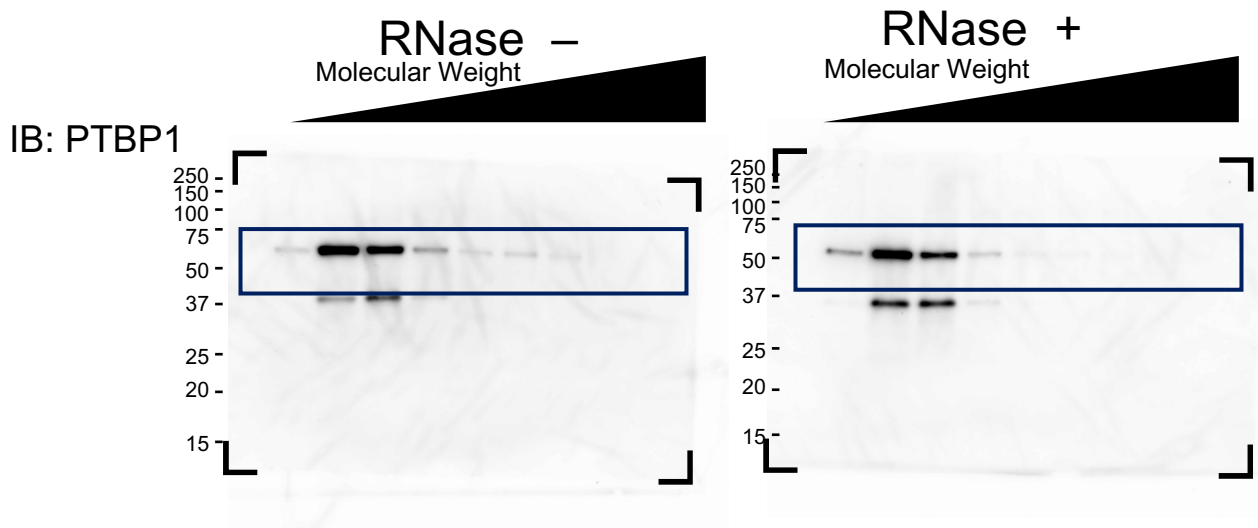

IB: hnRNP K

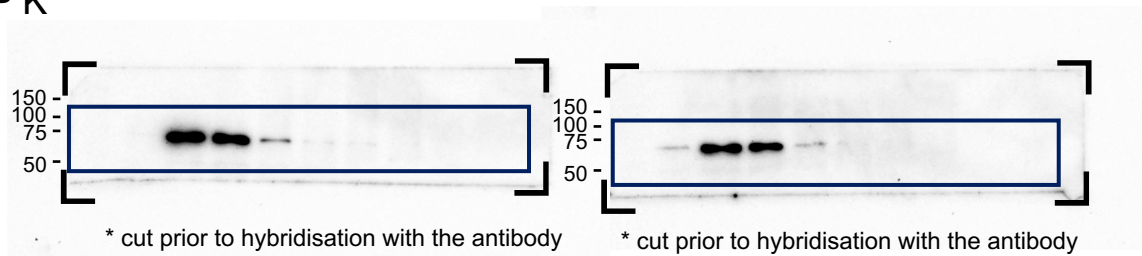

IB: hnRNP A3

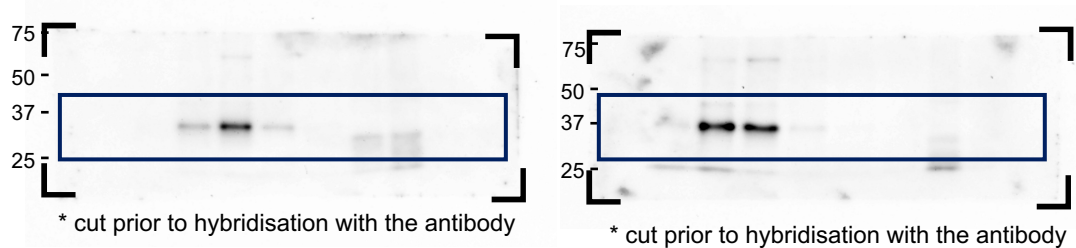

IB: hnRNP C

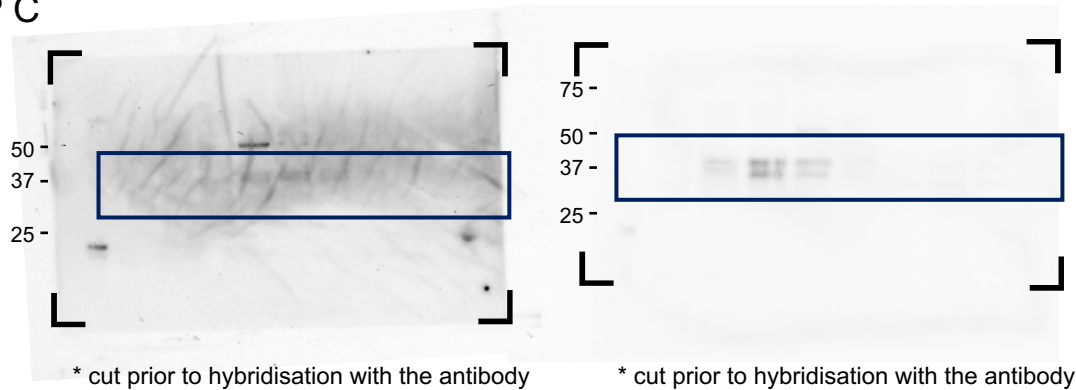



# Supplementary Figure S14-7

## Original silver-stained gel for Figure 3 (ALB)

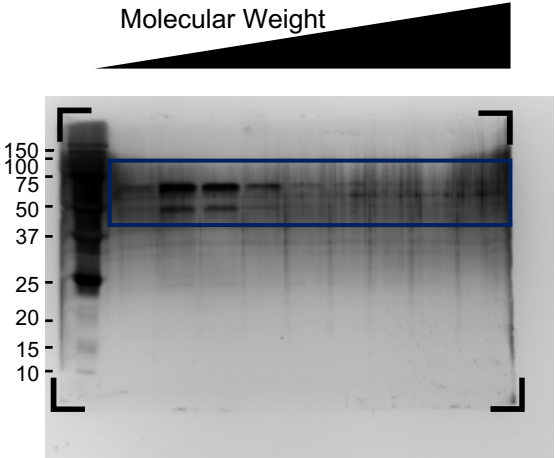

# Supplementary Figure S15-1

## Original blots and gel for Figure 5a

IB: FLAG

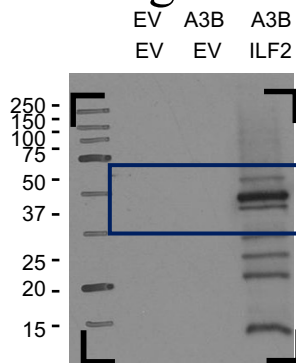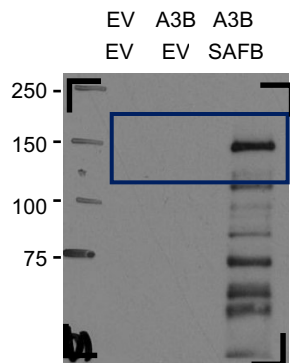

IB: HA

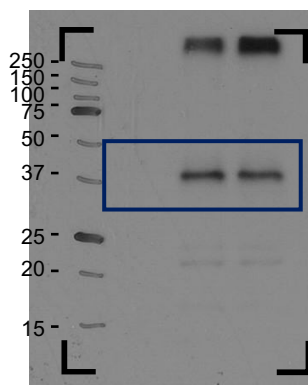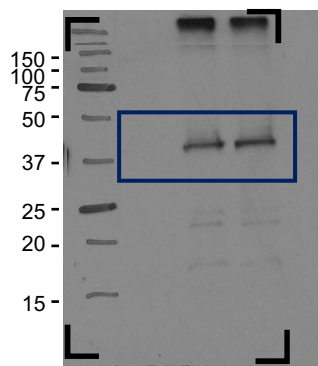

IB: LaminB1

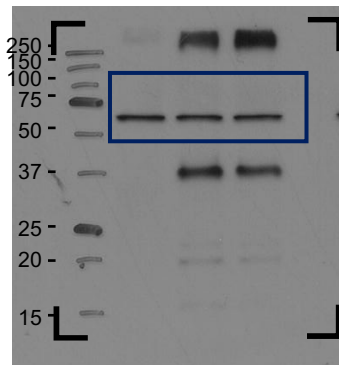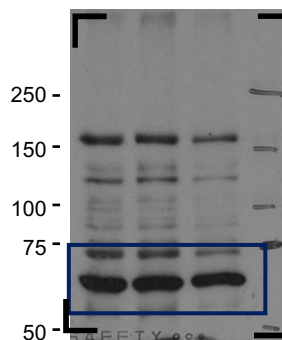

TBE-urea PAGE gel

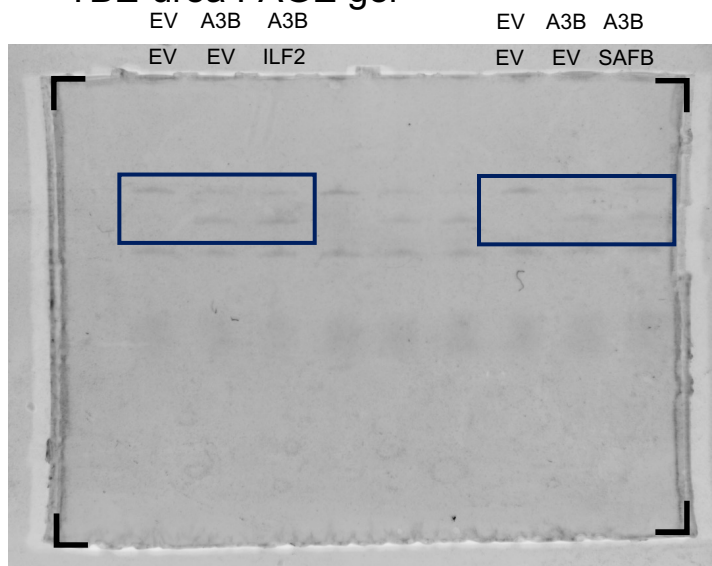

\* cut prior to hybridisation with the antibody

# Supplementary Figure S15-2

## Original blots and gel for Figure 5c

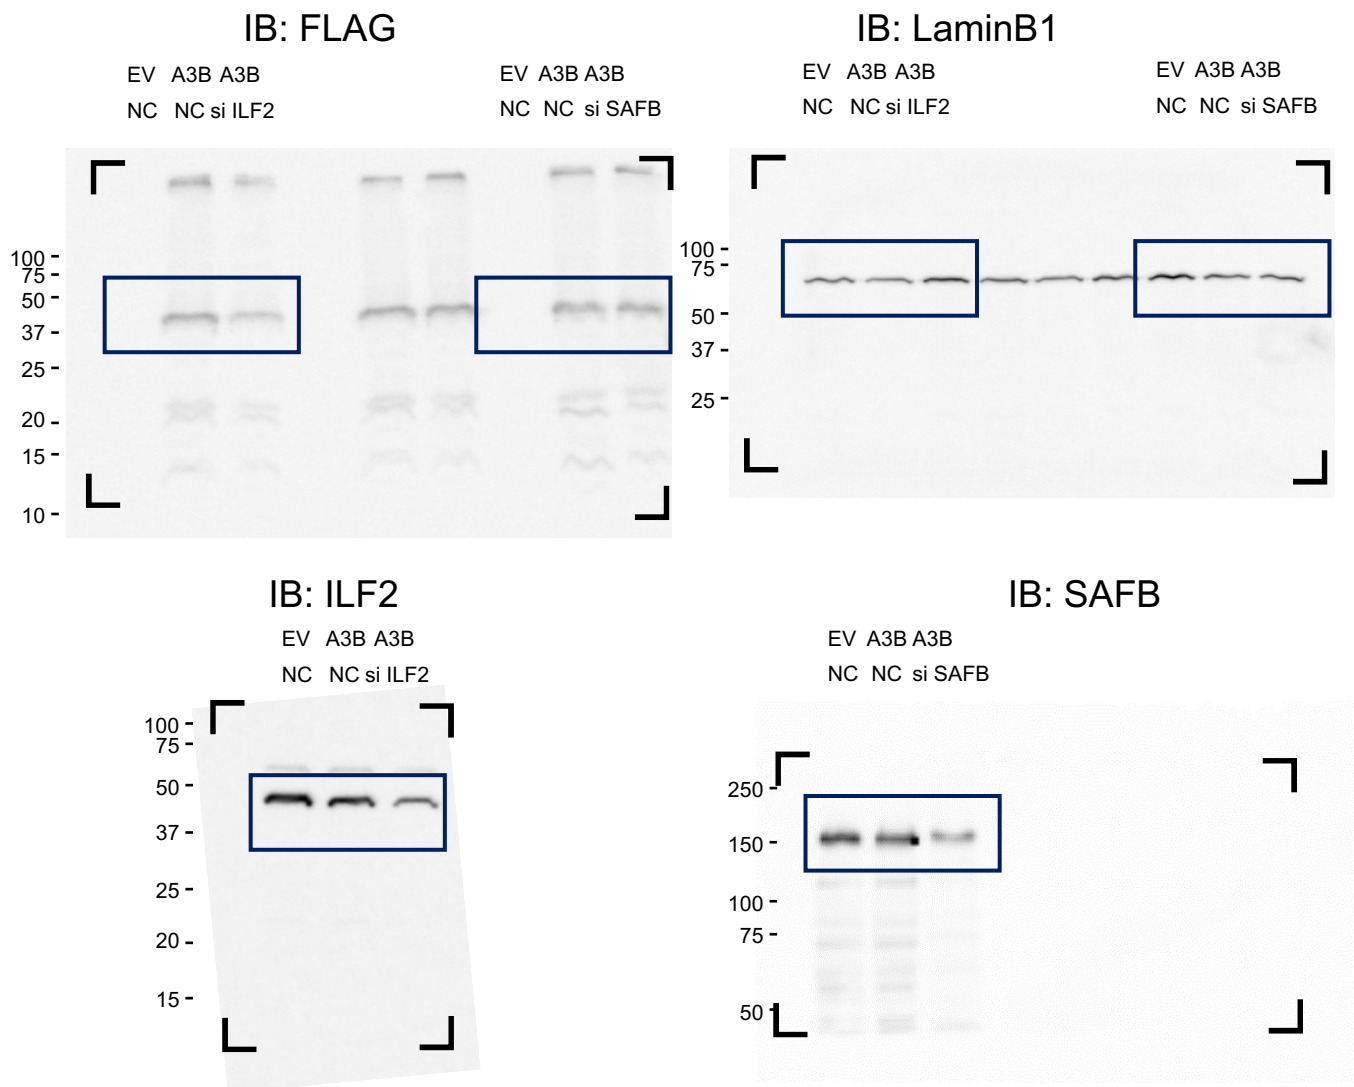

### TBE-urea PAGE gel

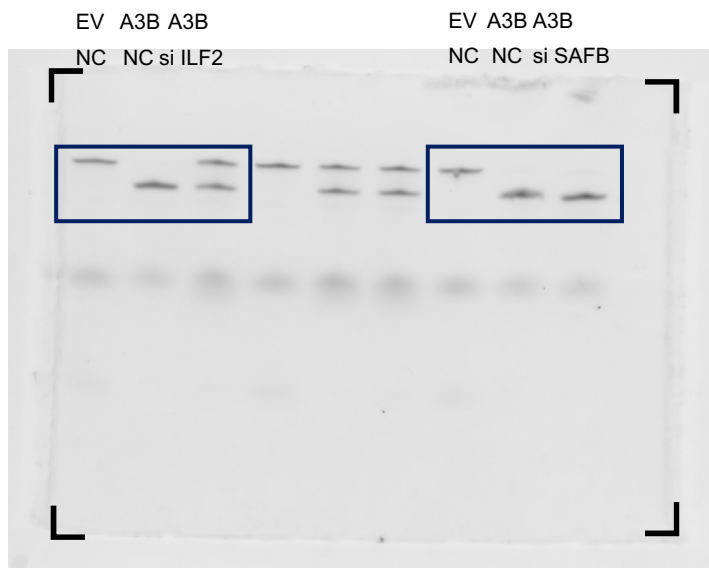

# Supplementary Figure S16-1

## Original blots and gel for Supplementary Figure S1a

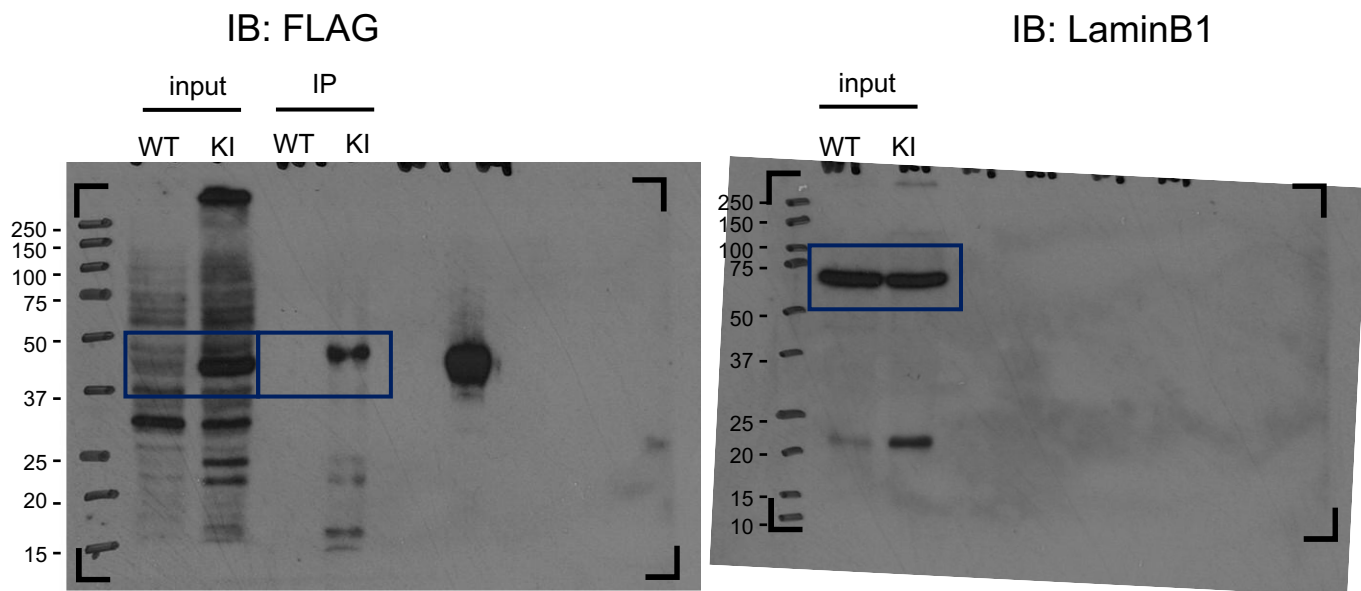

### Silver-stained gel

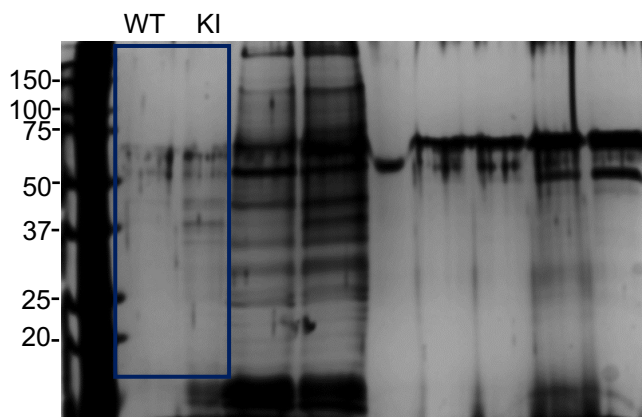

# Supplementary Figure S16-2

## Original blots and gel for Supplementary Figure S1b

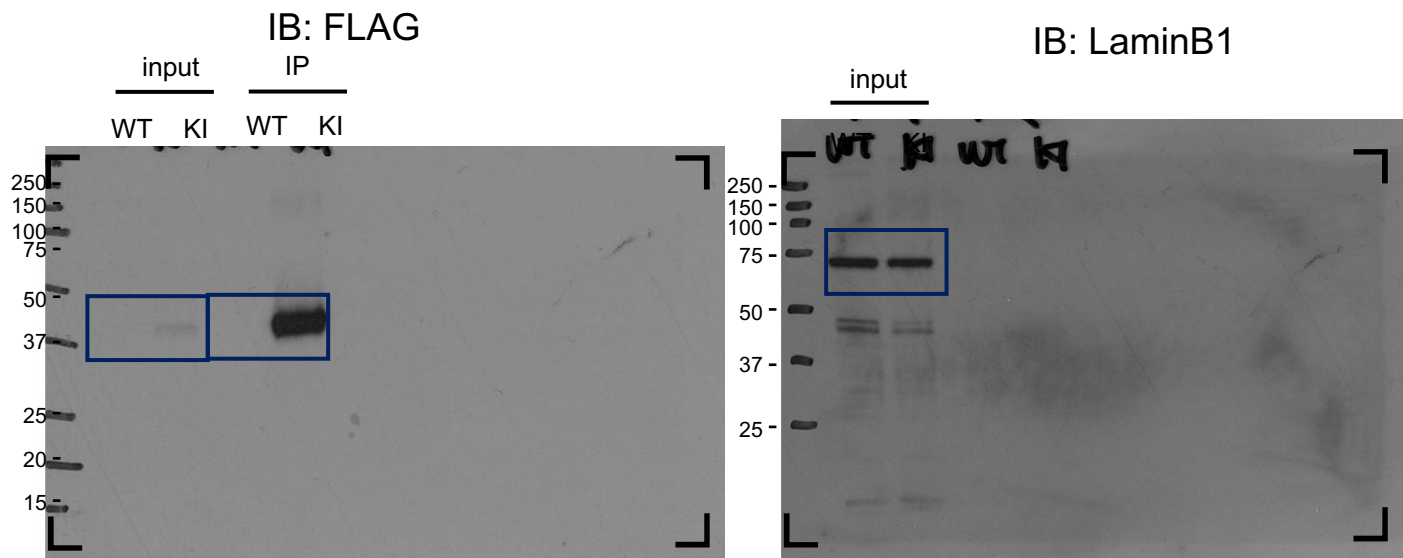

### Silver-stained gel

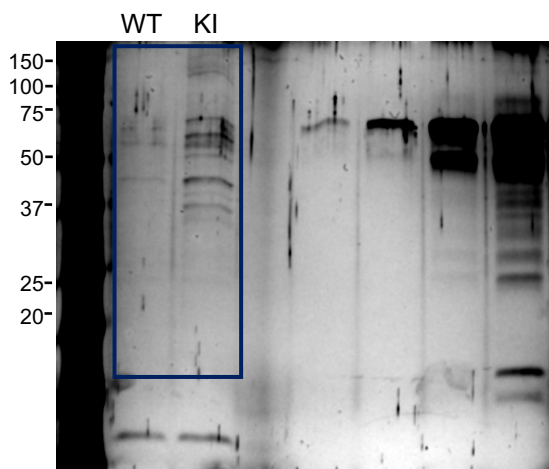

# Supplementary Figure S17

## Original gels for Supplementary Figure S9

**AMO1**  
**RNase -**

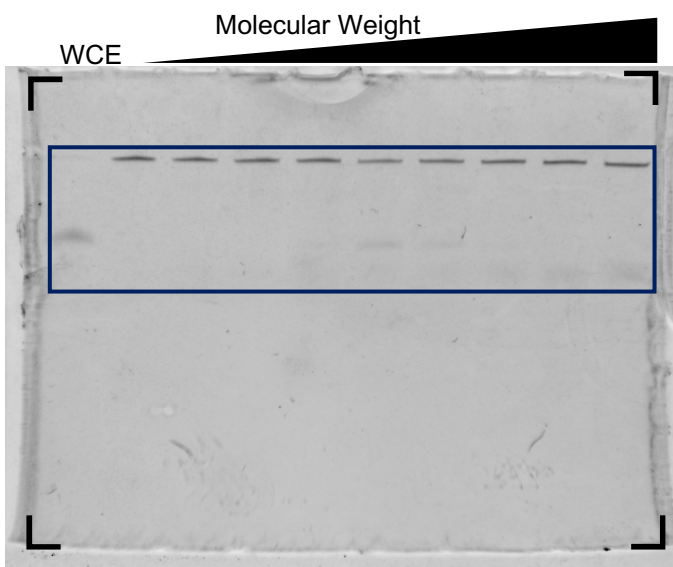

**AMO1**  
**RNase +**

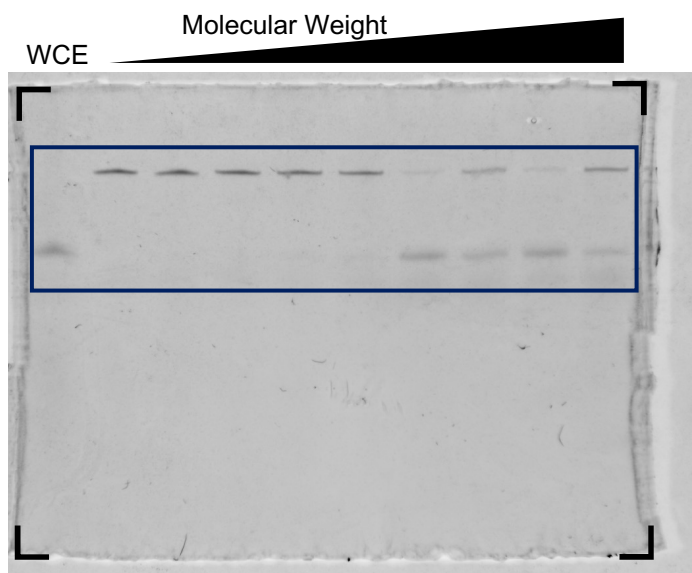

**RPMI8226**  
**RNase -**

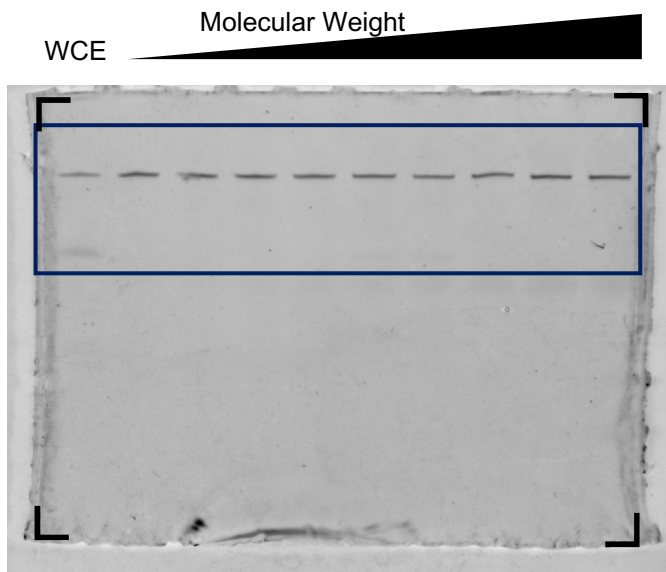

**RPMI8226**  
**RNase +**

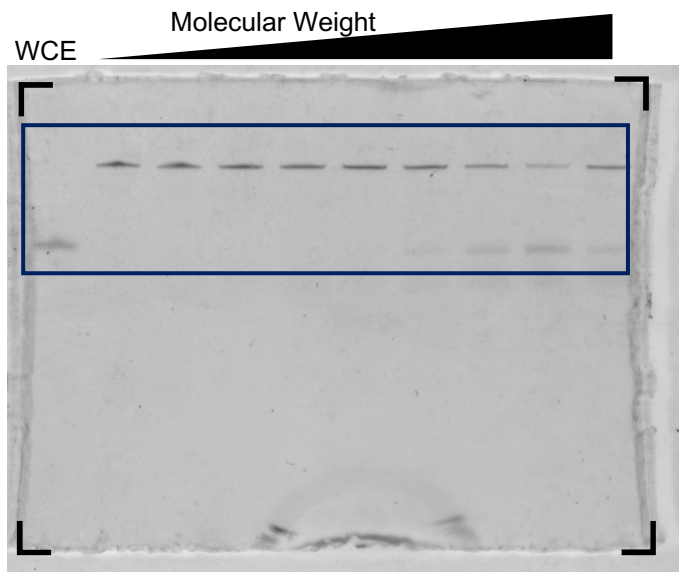

# Supplementary Figure S18-1

## Original blots for Supplementary Figure S10a

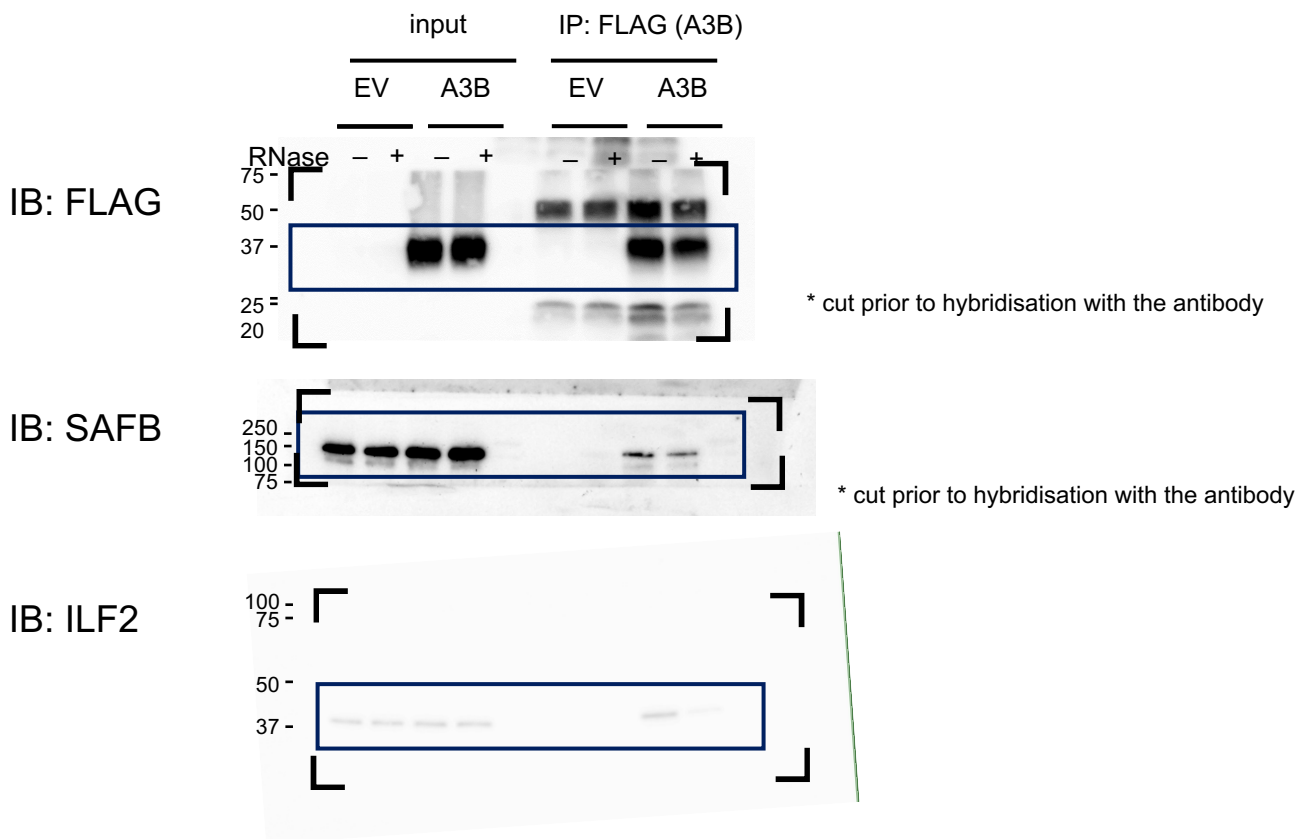

# Supplementary Figure S18-2

## Original blots for Supplementary Figure S10b

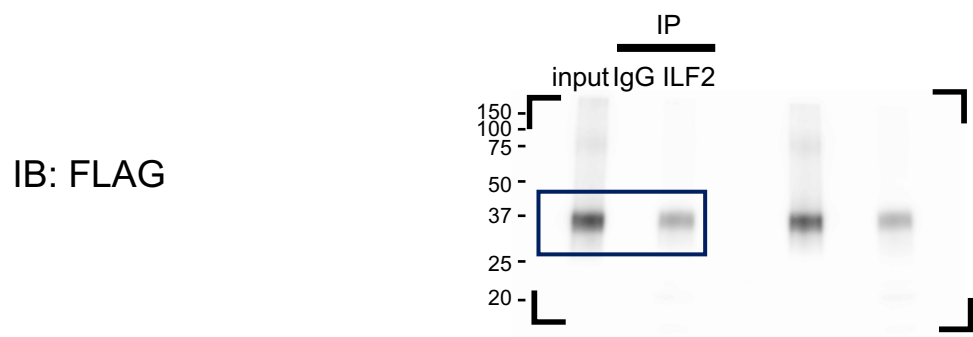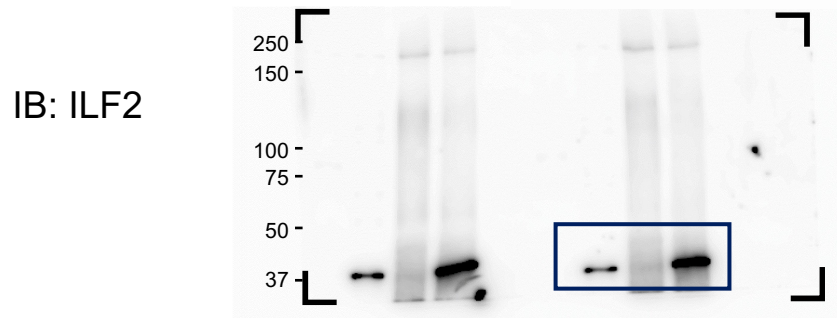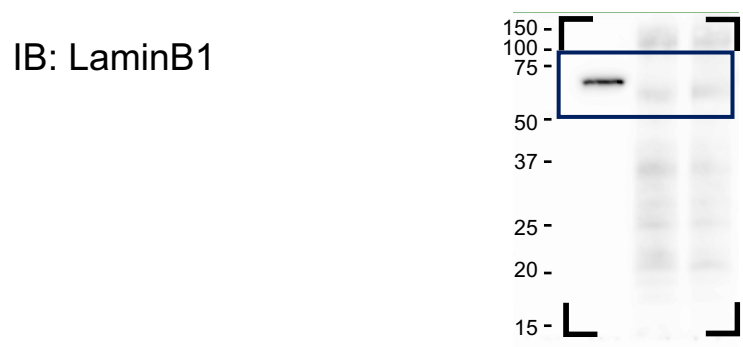



# Supplementary Figure S18-3

## Original blots for Supplementary Figure S10c

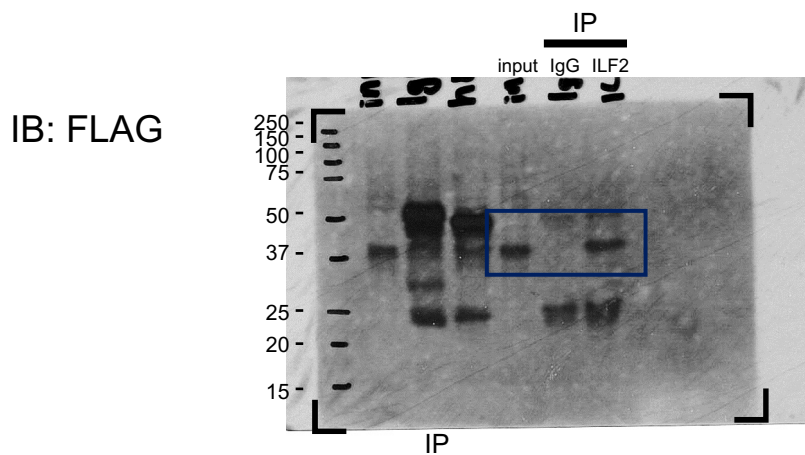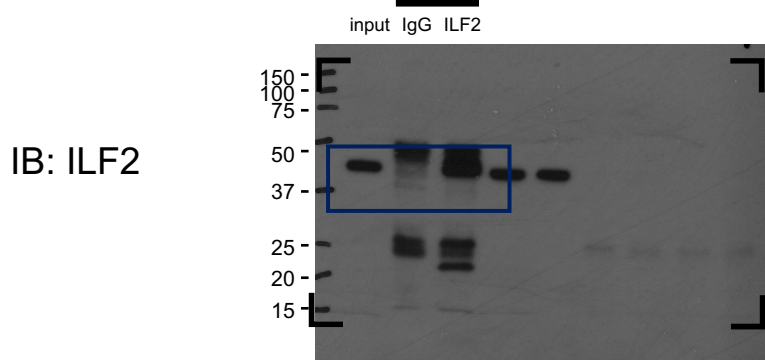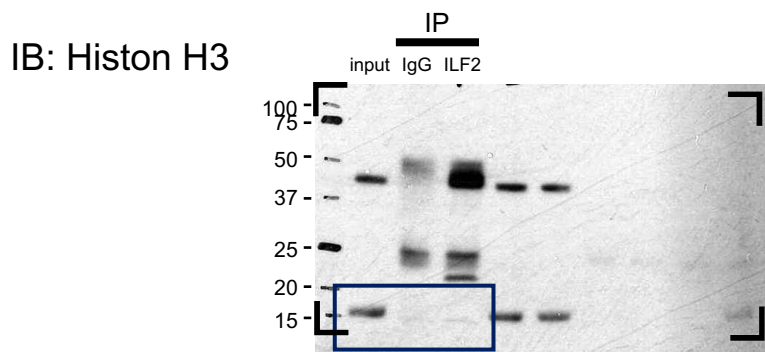

# Supplementary Figure S19

## Original gel for Supplementary Figure S12

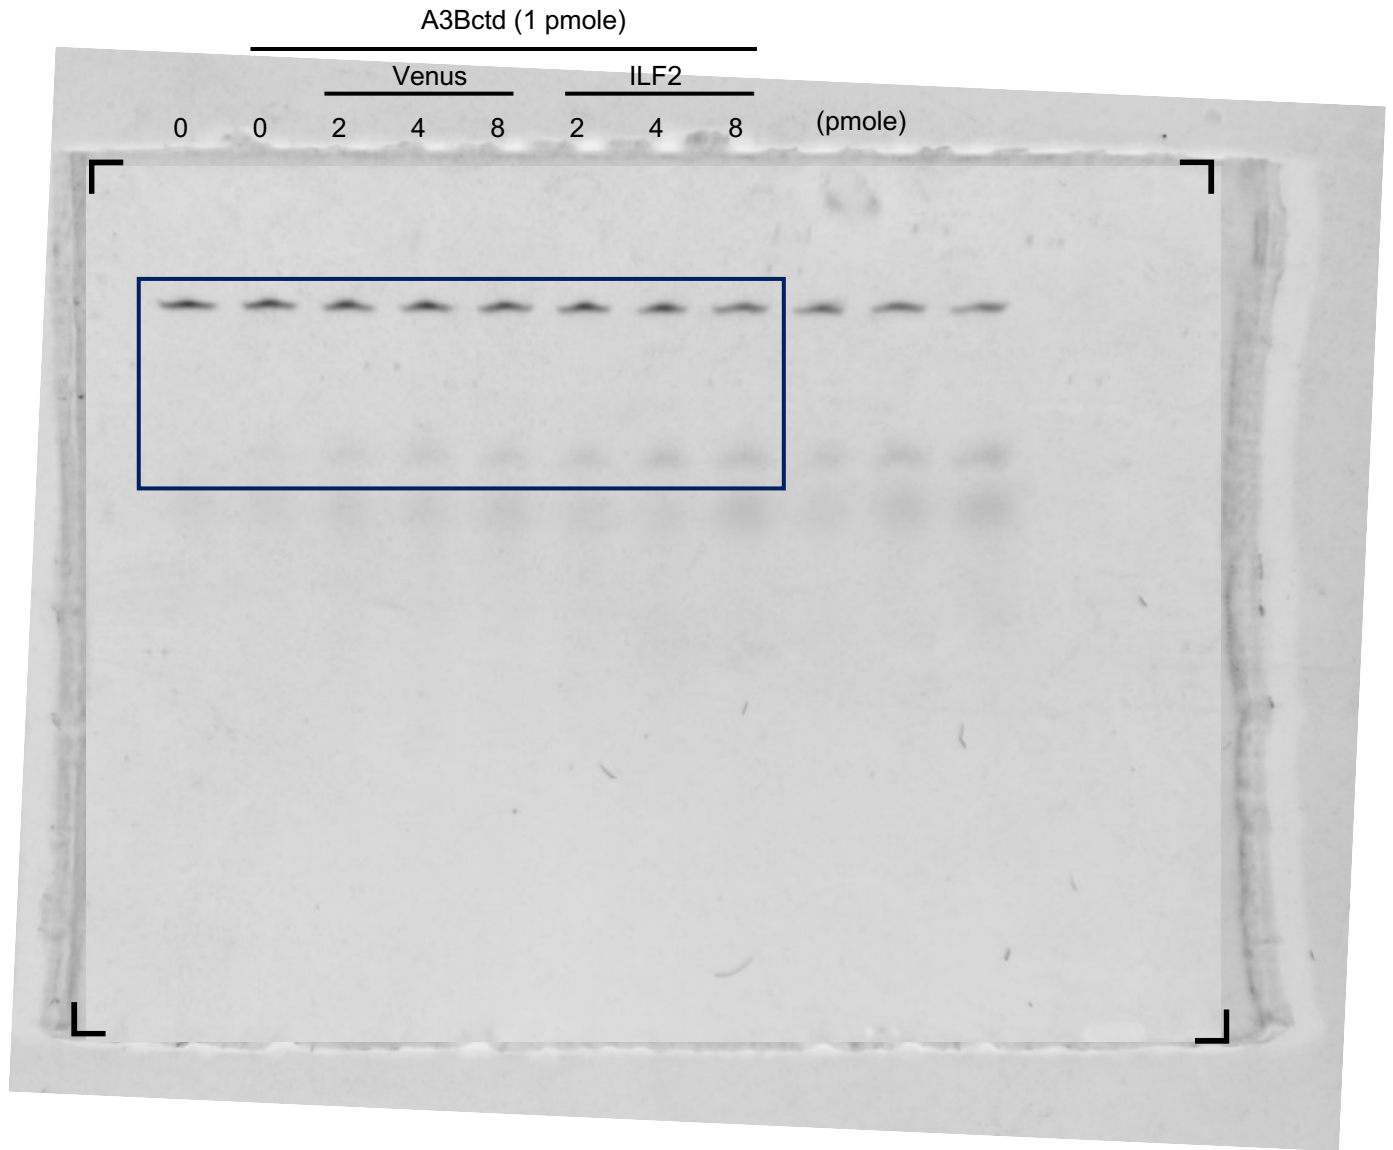

## **Legends for supplementary dataset files:**

### **Supplementary dataset file 1**

#### **Raw data of the identified interacting protein candidates in AMO1-KI cells.**

A3B interacting protein candidates in AMO1-KI cells are listed. Fold change of normalized relative abundance was calculated as the normalized abundance in AMO1-KI divided by that in AMO1-WT.

### **Supplementary dataset file 2**

#### **Raw data of the identified interacting protein candidates in RPMI-KI cells.**

A3B interacting protein candidates in RPMI-KI cells are listed and fold change calculated in the same way as for AMO1-KI (Supplementary dataset file 1).

### **Supplementary dataset file 3**

#### **Gene ontology (GO) and pathway enrichment analyses of interacting proteins in AMO1-KI and RPMI-KI.**

Significantly enriched GO Cellular Components, Biological Processes and Molecular Functions among the A3B-interacting proteins are ranked according to  $p$  values. The results of KEGG pathway analysis are also shown in Supplementary Figure S5a, b.
